## **Title: Systematic histone H4 replacement in *Arabidopsis thaliana* reveals a role for H4R17 in regulating flowering time**

### **Authors:**

Emma Tung Corcoran<sup>1</sup>, Chantal LeBlanc<sup>1</sup>, Mia Arias Tsang<sup>1</sup>, Anthony Sarkiss<sup>1</sup>, Yuzhao Hu<sup>2</sup>, Ullas V. Pedmale<sup>2</sup>, and Yannick Jacob<sup>1\*</sup>

### **Affiliations:**

<sup>1</sup> Yale University, Department of Molecular, Cellular and Developmental Biology, Faculty of Arts and Sciences; 260 Whitney Avenue, New Haven, Connecticut 06511, United States.

<sup>2</sup> Cold Spring Harbor Laboratory; Cold Spring Harbor, New York 11724, United States.

\* Corresponding author e-mail address: [yannick.jacob@yale.edu](mailto:yannick.jacob@yale.edu)

**Short title: H4R17 mediates ISWI-dependent nucleosome spacing in plants**

The author responsible for distribution of materials integral to the findings presented in this article in accordance with the policy described in the Instructions for Authors ([www.plantcell.org](http://www.plantcell.org)) is: Yannick Jacob ([yannick.jacob@yale.edu](mailto:yannick.jacob@yale.edu)).

1 **Abstract**

2 Despite the broad array of roles for epigenetic mechanisms on regulating diverse processes in  
3 eukaryotes, no experimental system for the direct assessment of histone function is currently  
4 available in plants. In this work, we present the development of a genetic strategy in *Arabidopsis*  
5 *thaliana* in which modified H4 transgenes can completely replace the expression of endogenous  
6 histone H4. Using this strategy, we established a collection of plants expressing different H4 point  
7 mutants targeting residues that may be post-translationally modified *in vivo*. To demonstrate the  
8 utility of this new H4 mutant collection, we screened it to uncover substitutions in H4 that alter  
9 flowering time. We identified different mutations in the tail (H4R17A) and the globular domain  
10 (H4R36A, H4R39K, H4R39A, and H4K44A) of H4 that strongly accelerate the floral transition.  
11 Furthermore, we found a conserved regulatory relationship between H4R17 and the ISWI  
12 chromatin remodeling complex in plants. Similar to other biological systems, H4R17 regulates  
13 nucleosome spacing via ISWI. Overall, this work provides a large set of H4 mutants to the plant  
14 epigenetics community that can be used to systematically assess histone H4 function in *A. thaliana*  
15 and a roadmap to replicate this strategy for studying other histone proteins in plants.

16 **Keywords (3-10):**

17 Histone H4, flowering time, chromatin remodeling, *Arabidopsis thaliana*

## 18 **Introduction**

19 In eukaryotic cells, genomic DNA is organized into chromatin. The basic unit of chromatin is the  
20 nucleosome, which consists of 147 base pairs of DNA wrapped around a histone octamer made up  
21 of two copies of histone protein H2A, H2B, H3 and H4 (Luger et al., 1997). Histones play a  
22 significant role in regulating processes operating at the chromatin level, such as transcription and  
23 replication, and consequently, can have widespread effects on organismal growth, development  
24 and fitness (Kouzarides, 2007). One mechanism by which histones contribute to these processes  
25 is through the post-translational modifications (PTMs) of histone residues. Traditionally, the  
26 functional significance of histone PTMs has primarily been deduced through the analysis of  
27 phenotypes resulting from the mutation of histone-modifying enzymes or histone-reading proteins.  
28 However, while this method has been successful at identifying functions for many histone PTMs,  
29 there are several limitations to this approach. For example, this strategy presents difficulties if  
30 there are many redundant proteins writing or reading the same PTM, or if the writers or readers of  
31 a specific histone PTM have not been identified. Moreover, histone-modifying enzymes often  
32 target non-histone substrates in addition to histones, complicating the analysis of mutant  
33 phenotypes (Glozak et al., 2005).

34 To circumvent these obstacles, one effective strategy to study the functions of histone PTMs is to  
35 mutate the acceptor histone residue to an unmodifiable residue and then assess the resulting  
36 phenotype(s). One inherent advantage of this strategy is that it can be applied to assess the roles  
37 of modifiable and non-modifiable residues of histones. In addition, this histone replacement  
38 strategy can be used in biological backgrounds expressing wild-type histones, or in backgrounds  
39 where expression of endogenous histones is partially or completely eliminated. A major advantage  
40 of removing endogenous histones in this strategy is that it increases the likelihood of detecting  
41 phenotypes associated with expression of histone mutants, which may otherwise be masked if  
42 competing wild-type histones are also present. Systematic mutagenesis experiments with core  
43 histones were initially conducted in *Saccharomyces cerevisiae* to reveal many new insights into  
44 histone function (Dai et al., 2008; Fu et al., 2021; Govin et al., 2010; Nakanishi et al., 2008). These  
45 experiments utilized histone shuffle systems to either provide an episomal plasmid expressing  
46 histone mutants in a background with the endogenous histone genes deleted, or to directly mutate  
47 the endogenous histone copies using homologous recombination. The most recent system

48 developed in *S. cerevisiae* utilized an efficient CRISPR/Cas9-based histone shuffle strategy that  
49 allows for the rapid development of multiplex histone mutations (Fu et al., 2021). In multicellular  
50 eukaryotes, *Drosophila melanogaster* is the first organism in which systematic histone  
51 mutagenesis was performed, and these systems used site-specific transgenesis to replace the  
52 endogenous histone coding region with that of a modified histone gene or histone array  
53 (Gunesdogan et al., 2010; Hodl and Basler, 2009, 2012; McKay et al., 2015). Additionally, high-  
54 throughput screens of histones H3 and H4 were recently conducted in this organism using a  
55 CRISPR/Cas9-mediated knock-in technology for histone gene replacement at the endogenous  
56 histone locus (Zhang et al., 2019).

57 In contrast to the aforementioned biological model systems, plant systems present additional  
58 challenges to implementing complete histone gene replacement. While all replication-dependent  
59 histone genes are clustered at a single genomic locus in *D. melanogaster* (Lifton et al., 1978), and  
60 *S. cerevisiae* contains only two copies of each core histone gene at the haploid cell stage (Fu et al.,  
61 2021), there are 47 genes encoding H2A, H2B, H3, and H4 in *Arabidopsis thaliana* found  
62 dispersed throughout the genome (Tenea et al., 2009). Because the histone genes are not clustered  
63 together in plants, the establishment of complex histone deletion mutants necessary for partially  
64 or completely replacing endogenous histone genes with modified histone genes is more  
65 challenging. Recently, histone replacement was performed in *A. thaliana* by using a combination  
66 of the traditional crossing of histone mutants and artificial microRNAs to generate backgrounds  
67 largely depleted of wild-type histone H3.1 (Jiang et al., 2017). However, this strategy is relatively  
68 time-consuming and may not completely eliminate endogenous histones. While the earliest  
69 strategies used to implement histone gene replacement in both *S. cerevisiae* and *D. melanogaster*  
70 were not applicable to plants due to their reliance on either the plasmid shuffle strategy and/or site-  
71 specific recombination systems, some aspects of the newest histone replacement strategies in other  
72 systems should facilitate the establishment of complete histone gene replacement in plants. For  
73 example, recent advancements in the deployment of multiplex CRISPR/Cas9-based technologies  
74 in plants make possible the creation of mutations in large gene families like histones.

75 While histones have been demonstrated to contribute to diverse processes in plants, a system  
76 enabling histone gene replacement would allow plant researchers to further elucidate the biological



77 roles of histones in a more high-throughput manner. One of the most important developmental  
78 processes in plants is the transition from vegetative growth to reproductive development (Andres  
79 and Coupland, 2012; Song et al., 2015). Thus, the ways in which epigenetic mechanisms regulate  
80 the floral transition is a major area of research that could benefit from the application of histone  
81 replacement strategies. Diverse histone PTMs, including histone H3 lysine 4 (H3K4) methylation,  
82 H3K36 di- and tri-methylation, H3K9 methylation, H3K27 methylation, and H3 acetylation have  
83 been shown to regulate the expression of key flowering time regulatory genes such as  
84 *FLOWERING LOCUS C (FLC)* and *FLOWERING LOCUS T (FT)* (Bastow et al., 2004; Bu et al.,  
85 2014; Crevillen et al., 2019; Crevillen et al., 2014; Cui et al., 2016; Deng et al., 2007; He, 2009;  
86 He et al., 2004; Jiang et al., 2008; Kim et al., 2005; Ning et al., 2019; Pajoro et al., 2017; Pien et  
87 al., 2008; Xu et al., 2008; Yu et al., 2011; Zheng et al., 2019). However, compared to H3, the role  
88 of H4 in regulating the floral transition has been characterized to a much lesser extent.

89 Here, we present the establishment of a CRISPR-based histone mutagenesis platform in the plant  
90 model system *A. thaliana* that allows for complete histone replacement. As a proof-of-concept, we  
91 targeted histone H4, which is encoded by the largest number of endogenous genes (i.e. eight genes)  
92 among functionally-distinct histone proteins in plants (Okada et al., 2005; Tenea et al., 2009;  
93 Wierzbicki and Jerzmanowski, 2005), for systematic assessments of the roles of modifiable  
94 residues on this protein. After *in vivo* validation of our histone replacement strategy, we generated  
95 a large population of H4 point mutants to study the role(s) of 38 histone H4 residues. Using this  
96 H4 population, we identified a novel role for H4R17 in the regulation of flowering time.  
97 Furthermore, we demonstrated the functional relationship between H4R17 and an imitation switch  
98 (ISWI) chromatin-remodeling complex. Overall, this study demonstrates the utility of  
99 implementing histone replacement strategies in plants and provides a new resource that the plant  
100 community can use to probe for H4 functions in various aspects of plant growth and development.

## 101 **Results**

### 102 **Generation of an *A. thaliana* mutant expressing a single histone H4 gene**

103 In order to create a library of *A. thaliana* plants with replacement of endogenous histone H4 with  
104 H4 point mutants, we first generated a histone H4 depleted background using multiplex  
105 CRISPR/Cas9. The eight histone H4 genes in *A. thaliana* (Columbia [Col] ecotype) all code for  
106 the same histone H4 protein that is 98% identical to human histone H4 (100/102 identical a.a.;  
107 conservative substitutions at a.a. 60 and 77) (Supp. Fig. 1A). We designed three guide RNAs  
108 (gRNAs) that can target Cas9 to seven of the eight endogenous H4 genes (Supp. Fig. 1B). We then  
109 transformed Col plants via *Agrobacterium* using a multiplex Cas9/gRNA construct containing the  
110 three gRNAs against the H4 genes, selected first-generation transformants (T1), and exposed these  
111 T1 plants to repeated heat stress treatments at 37°C for 30h to increase the efficiency of targeted  
112 mutagenesis by Cas9 (LeBlanc et al., 2017). CRISPR/Cas9 activity was assessed at all seven H4  
113 genes via PCR and sequencing in T1 plants, leading to the identification in the T2 generation of a  
114 plant with homozygous loss-of-function mutations in all seven targeted H4 genes (hereafter  
115 referred to as the H4 septuple mutant) (Supp. Fig. 1B). Morphological and molecular  
116 characterization of the H4 septuple mutant plants showed that they were slightly smaller than wild-  
117 type Col plants and displayed a serrated leaf phenotype (Fig. 1A). In addition, fertility was much  
118 lower in the H4 septuple mutant compared to Col plants (Fig. 1B). We found that transcription of  
119 the remaining endogenous H4 gene (*At3g53730*) was upregulated approximately 2-fold in the H4  
120 septuple mutant relative to Col, likely to compensate for H4 depletion due to the loss of function  
121 of the other seven H4 genes (Fig. 1C). The H4 septuple mutant exhibited mis-regulation of markers  
122 of genomic and epigenomic instability, including up-regulation of the DNA damage response gene  
123 *BRCA1* and transcriptional de-repression of the heterochromatic DNA repeat *TSI* (Fig. 1D-E).  
124 These results demonstrate that multiplex CRISPR/Cas9 can be used to rapidly create an *A. thaliana*  
125 mutant background containing a minimal amount of functional genes coding for a specific histone.

### 126 **Establishment of a histone H4 replacement system in *A. thaliana***

127 To set up complete histone H4 replacement in plants, we designed an H4 replacement plasmid that  
128 contains 1) a gRNA targeting the last remaining endogenous H4 gene (*At3g53730*) and 2) a Cas9-  
129 resistant H4 gene allowing for expression of *At3g53730* under its native promoter (i.e. H4

130 replacement gene). Our strategy was to transform the H4 septuple mutant, which expresses Cas9,  
131 with the H4 replacement plasmid and select T1 plants that contain mutations at the endogenous  
132 *At3g53730* gene. To prevent Cas9 from targeting the replacement H4 gene, we introduced two  
133 silent mutations in this gene that prevent recognition from the gRNA targeting the endogenous  
134 *At3g53730* gene (Fig. 1F). After transformation of the H4 septuple mutant with the H4 replacement  
135 plasmid, we recovered many T1 transformants expressing the replacement H4 gene (hereafter  
136 referred to as rH4 plants), and in contrast to the H4 septuple mutant, all rH4 plants were normal in  
137 size, did not exhibit serrated leaves and showed normal fertility (Fig. 1A-B). Moreover, the RNA  
138 expression levels of *BRCA1* and *TSI* in rH4 plants were comparable to levels observed in Col (Fig.  
139 1D-E). The expression of *At3g53730* in first-generation rH4 plants was found to be upregulated  
140 approximately 4- to 9-fold relative to Col (Fig. 1C). These results indicate that high expression  
141 levels of the replacement H4 gene in rH4 plants are responsible for suppressing the morphological  
142 phenotypes of the H4 septuple mutant.

143 We then used site-directed mutagenesis to create a large library of H4 replacement plasmids  
144 carrying different point mutations in the H4 replacement gene. We generated mutations covering  
145 every amino acid (i.e. lysine, arginine, threonine, serine, and tyrosine) in H4 that could  
146 theoretically be post-translationally modified *in vivo*. Each modifiable amino acid was mutated to  
147 a residue that cannot be post-translationally modified (i.e. alanine, valine or phenylalanine). We  
148 also substituted lysine and arginine residues with residues having similar biochemical properties  
149 (i.e. arginine and lysine, respectively). In total, we modified 38 amino acid residues of H4 to  
150 generate 63 different H4 replacement genes containing a specific point mutation (Fig. 1G). We  
151 subcloned these H4 mutant genes into the H4 replacement plasmid and individually transformed  
152 them into the H4 septuple mutant. We selected two independent transgenic lines for each H4  
153 mutant, except for plants expressing the replacement genes H4 arginine 40 to alanine (rH4R40A),  
154 rH4R45A, rH4K59A, rH4R78A, rH4K79R and rH4R92K due to lethality induced by these  
155 mutations. All T1 plants were exposed to repeated heat stress treatments to maximize the efficiency  
156 of targeted mutagenesis of the remaining endogenous H4 gene by Cas9. To estimate the frequency  
157 of mutations at the remaining endogenous H4 gene in the plants expressing the replacement H4  
158 gene, we genotyped three plants each from two independent rH4 lines and two independent  
159 rH4K16A lines at the T2 generation stage. We amplified the remaining endogenous H4 gene

160 (*At3g53730*) from these T2 plants, cloned the resulting PCR products and sequenced at least ten  
161 individual clones corresponding to each plant, and calculated the percentage of mutated alleles.  
162 Approximately half of the plants were characterized by a complete elimination of the wild-type  
163 *At3g53730* allele, while the other plants varied from 50 to 75% wild-type alleles remaining (Fig.  
164 1H). Taking into account that expression of the replacement H4 gene is either equivalent or much  
165 higher compared to the remaining endogenous H4 gene (Fig. 1C), these results suggest that the  
166 chromatin of most T2 plants in our H4 replacement collection contains large amounts of H4 point  
167 mutants. Overall, these results show that our CRISPR strategy was successful in creating a large  
168 collection of *A. thaliana* plants expressing different H4 point mutants replacing wild-type H4  
169 proteins.

#### 170 **Differential regulation of flowering time in plants expressing histone H4 mutants**

171 To demonstrate the utility of the H4 replacement collection in identifying pathways regulated by  
172 H4 in *A. thaliana*, we initiated a screen of the plants expressing H4 mutants for defects in flowering  
173 time. The transition between vegetative and reproductive development in *A. thaliana* has been  
174 shown to be sensitive to various chromatin disruptions, but most of the findings in this field have  
175 focused on the roles of post-translational modifications on histone H3 (Berry and Dean, 2015; He,  
176 2009; He and Amasino, 2005; Srikanth and Schmid, 2011; Yaish et al., 2011).

177  
178 We grew our collection of H4 mutants using T2 plants from two independent lines for each H4  
179 mutant, and measured flowering time (days to flowering and leaf number) in both short-day  
180 conditions (8 hours light, 16 hours dark) and long-day conditions (16 hours light, 8 hours dark).  
181 We identified many morphological and developmental phenotypes at the vegetative stage of  
182 growth in T2 plants expressing the different H4 mutants (Fig. 2A, Supp. Fig. 2A), which  
183 demonstrates that our H4 replacement strategy can be used to reveal various developmental  
184 phenotypes associated with mutations on histone H4. In regard to flowering time, we did not  
185 observe plants expressing H4 point mutants that were associated with a consistent and significant  
186 late flowering-time phenotype compared to rH4 plants (i.e. replacement with WT H4 gene) for  
187 both transgenic lines corresponding to the same mutation in either long-day or short-day conditions.  
188 In contrast, 16 rH4 mutants were identified as displaying an early flowering phenotype using the

189 same criteria (Fig. 2B-C, Supp. Fig. 2B-C, Supp. Fig. 3). Many rH4 mutant lines exhibited early  
190 flowering in both long-day and short-day conditions, with the rH4R17A, rH4R36A, rH4R39K,  
191 rH4R39A, and rH4K44A mutants exhibiting the most consistent and drastic decrease in flowering  
192 time. In order to reduce the dimensionality of the data, we performed principal component analysis  
193 of the four flowering time variables measured in our analyses: mean day number in long-day, mean  
194 leaf number in long-day, mean day number in short-day, and mean leaf number in short-day (Fig.  
195 2D). We performed *k*-means clustering on PC1 and PC2, which together explained 98% of the  
196 variance (Supp Fig. 2D), to identify three clusters in the data. Cluster a, corresponding to a  
197 flowering response most similar to wild-type plants, contained Col, the H4 septuple mutant, rH4,  
198 rH4K16A, rH4K20R, and rH4K20A. Cluster b, corresponding to a moderately early flowering  
199 time phenotype, contained rH4R17K, rH4R35K, rH4R35A, rH4R36K, rH4R40K, and rH4K44R.  
200 Cluster c, corresponding to a drastically early flowering time phenotype, contained rH4R17A,  
201 rH4R36A, rH4R39K, rH4R39A, and rH4K44A. The two rH4K16R lines were split between  
202 Cluster a and Cluster b, and the two rH4T80V lines were split between Cluster b and Cluster c.  
203 While the rH4K16R, rH4K16A, rH4K20R, and rH4K20A mutants appeared slightly early  
204 flowering relative to rH4 plants (Fig. 2B-C, Supp. Fig. 2B-C), all of these mutant lines except for  
205 a single rH4K16R line clustered within the wild-type cluster (Cluster a) through these analyses.  
206 We performed RT-qPCR analyses on key genes (*FLOWERING LOCUS T (FT)* and *SUPPRESSOR*  
207 *OF OVEREXPRESSION OF CO 1 (SOC1)*) regulating flowering time and observed upregulation  
208 of these genes consistent with the early flowering behavior of rH4 mutants from different clusters  
209 (Fig. 2E-F). Taken together, our histone H4 replacement system enables the assessment of  
210 expressing histone H4 mutants on flowering time regulation, thus demonstrating the usefulness of  
211 the system for probing histone H4 function in plants.

## 212 ***In vivo* modulation of *PRMT7* activity does not replicate the early flowering phenotype of** 213 **rH4R17A plants**

214 Among the five H4 mutations (H4R17A, H4R36A, H4R39K, H4R39A, and H4K44A) identified  
215 in our screen to cause the strongest effect on flowering time, only one of them (H4R17A) is present  
216 in the N-terminal tail (a.a. 1-20) of H4 where most of the histone post-translational modifications  
217 (PTMs) are made. Mutations in the unstructured N-terminal tail of H4 are less likely to affect

218 flowering time by disrupting histone H4 folding and/or nucleosome structure than mutations in the  
219 histone-fold domain. Therefore, we focused our subsequent analyses on trying to elucidate the  
220 mechanism by which H4R17A affects the timing of the transition to reproductive development.  
221 For this work, we used H4 replacement plants for which there was a complete replacement of the  
222 endogenous histone H4 with H4R17A (Supp. Fig. 4A). In addition to a significantly early floral  
223 transition, we found that the H4R17A mutation also causes other developmental phenotypes,  
224 including smaller, upwardly curled leaves and reduced fertility compared to wild-type plants (Fig.  
225 3A-B).

226 One hypothesis regarding the mechanism by which the H4R17A mutation causes early flowering  
227 is that it prevents deposition of a post-translational modification on H4R17. PROTEIN  
228 ARGININE METHYLTRANSFERASE 7 (PRMT7) is the only known histone-modifying enzyme  
229 of H4R17 in eukaryotes, as it has been shown to mono-methylate H4R17 in mammals (Feng et al.,  
230 2014; Feng et al., 2013; Jain and Clarke, 2019). The *A. thaliana* genome contains a single  
231 orthologous gene for *PRMT7* (*At4g16570*), which has never been functionally characterized. To  
232 assess a potential role for PRMT7 in regulating flowering time via methylation of H4R17, we  
233 measured flowering time in *prmt7* mutants (SALK\_028160 and SALK\_039529) and in plants  
234 overexpressing the *PRMT7* gene (i.e. *35S::PRMT7*). We confirmed by RT-qPCR that both T-DNA  
235 alleles used in these experiments prevent the expression of a full-length *PRMT7* transcript and that  
236 *PRMT7* was overexpressed in the *35S::PRMT7* plants that we generated (Fig. 3C-F). Our analyses  
237 of flowering time caused by modulation of the *PRMT7* gene in plants showed that neither *prmt7*  
238 mutants nor *PRMT7* overexpressing plants displayed altered flowering time in either long-day  
239 conditions or short-day conditions (Fig. 3G-H, Supp. Fig. 4B-C). In addition, none of the other  
240 vegetative or reproductive phenotypes observed in rH4R17A plants were found in plants lacking  
241 or overexpressing *PRMT7*. These results strongly suggest that replacement of H4 with H4R17A  
242 does not affect development in *A. thaliana* by interfering with PRMT7 activity on histone H4.

### 243 **Functional relationship between H4R17 and ISWI in the regulation of flowering time**

244 In addition to affecting the deposition of PTMs, mutation of histone residues can prevent binding  
245 of proteins to chromatin (Hyland et al., 2005; Norris et al., 2008). Therefore, we next investigated



246 the possibility that replacement of histone H4 with H4R17A affects plant development by  
247 negatively impacting the function of plant ISWI chromatin-remodeling complexes. In yeast and  
248 animals, R17 of H4 has been shown to directly interact with ISWI to regulate nucleosome  
249 remodeling activity *in vitro* and *in vivo* (Clapier et al., 2001; Clapier et al., 2002; Dann et al., 2017;  
250 Fazio et al., 2005; Hamiche et al., 2001; Ludwigsen et al., 2017; Mueller-Planitz et al., 2013;  
251 Racki et al., 2014; Yan et al., 2016). Mutations in genes coding for different *A. thaliana* ISWI  
252 subunits (CHR11, CHR17, RLT1, RLT2 and ARID5) result in plants showing similar phenotypes  
253 as rH4R17A mutants, including early flowering, upwardly curled leaves, reduced fertility, and a  
254 small size relative to wild-type plants (Fig. 4A-D, Supp. Fig. 5) (Li et al., 2012). Defects in the  
255 timing of the floral transition and other developmental aspects are more similar between the  
256 rH4R17A mutants and the ISWI accessory subunit single mutant *arid5* and double mutant *rlt1 rlt2*  
257 (*rlt1/2*; *RLT1* and *RLT2* were shown to act redundantly (Li et al., 2012)) compared to mutations in  
258 the ISWI catalytic subunits *CHR11* and *CHR17* (*CHR11/17*; also shown to act redundantly (Li et  
259 al., 2012)), which cause more severe developmental phenotypes (Fig. 4A-D, Supp. Fig. 5) (Li et  
260 al., 2012). The increased severity of the phenotypes displayed by the *chr11/17* double mutant may  
261 be caused by the joint disruption of the ISWI and SWR1 chromatin-remodeling complexes, which  
262 both contain CHR11/17 (Luo et al., 2020). In contrast, ARID5 and RLT1/2 are present in ISWI,  
263 but not in SWR1. In addition, RLT1 and RLT2 are only two of 12 DDT-domain proteins in *A.*  
264 *thaliana*, and different ISWI complexes were found to associate with different DDT-domain  
265 proteins *in vivo* (Dong et al., 2013; Tan et al., 2020).

266 To further investigate the interplay in plants between H4R17 and ISWI, we performed whole-  
267 transcriptome analysis via RNA sequencing (RNA-seq) on the rH4R17A, *arid5*, *rlt1/2*, *chr11/17*  
268 and *pie1* (catalytic subunit of the SWR1 complex) mutants grown in short-day conditions. Our  
269 results from the RNA-seq analyses showed that there were 1771 downregulated genes and 1471  
270 upregulated genes in *chr11/17* double mutants (3242 differently expressed genes [DEGs] in total),  
271 while there were only 535 downregulated genes and 299 upregulated genes in the rH4R17A-1  
272 mutant (834 DEGs), and 410 downregulated genes and 375 upregulated genes in the rH4R17A-2  
273 mutant (785 DEGs) (Fig. 4E). In spite of the large difference in the total amount of DEGs between  
274 *chr11/17* mutants and the rH4R17A plants, we observed a high overlap between the DEGs in the  
275 *chr11/17* and rH4R17A-1 mutants (45.6%, 380/834), as well as the DEGs in the *chr11/17* and

276 rH4R17A-2 mutants (56.0%, 440/785) (Fig. 4E). Additionally, we observed a high overlap of  
277 DEGs (average 50.0% rH4R17A vs. *arid5*; average 52.5% rH4R17A vs. *rtl1/2*) when comparing  
278 the rH4R17A lines with the ISWI subunit mutants *arid5* and *rtl1/2* (Fig. 4F-G). Furthermore, in  
279 the rH4R17A, *chr11/17*, *arid5*, and *rtl1/2* mutants, we detected a similar pattern of RNA  
280 expression not shared by rH4 or Col plants, indicated by the clustering of both rH4R17A lines and  
281 all ISWI subunit mutants together (Fig. 4H). In contrast, we did not observe substantial overlap  
282 (average 25.8%) between the DEGs identified in *piel* mutants and the DEGs of rH4R17A mutants  
283 (Fig. 4H, Supp. Fig. 6A). We then investigated the expression of key flowering time regulatory  
284 genes and found that the flowering promoter genes *FRUITFULL* (*FUL*), *SOC1* and *FT* were all  
285 co-upregulated in the rH4R17A, *rtl1/2*, *arid5*, and *chr11/17* mutants (Fig. 4I, Supp. Fig. 6B). These  
286 patterns of co-expression were not observed when comparing *rtl1/2*, *arid5*, and *chr11/17* mutants  
287 to rH4 plants (Fig. 4H-I, Supp. Fig. 6B). The shared developmental phenotypes and transcriptional  
288 profiles of the rH4R17A, *rtl1/2*, *arid5*, and *chr11/17* mutants suggest that H4R17 plays an  
289 important role in plants as in other eukaryotes in regulating the activity of ISWI on chromatin.

## 290 **Impact of H4R17A mutation on global nucleosome positioning**

291 ISWI functions as a chromatin remodeling complex that properly organizes nucleosome spacing  
292 at transcriptionally active genes in eukaryotes (Clapier and Cairns, 2009; Gkikopoulos et al., 2011;  
293 Li et al., 2014; Yadon and Tsukiyama, 2011). Due to the similarity in the phenotypes and  
294 transcriptional profiles between rH4R17A plants and mutants in the *Arabidopsis* ISWI complex,  
295 we hypothesized that expression of H4R17A interferes with nucleosome spacing in plants. To  
296 address this hypothesis, we assessed global nucleosome positioning in rH4R17A mutants using  
297 micrococcal nuclease digestion followed by deep sequencing (MNase-seq). Consistent with  
298 previous results, a relatively lower nucleosome density was found in the 1-kb region upstream of  
299 the transcription start site (TSS) of protein-coding genes, while a relatively high density, evenly  
300 spaced nucleosome distribution was found in the 1-kb region downstream of the TSS for Col plants  
301 (Fig. 5A) (Li et al., 2014). Moreover, expressed protein-coding genes were generally observed to  
302 display more highly phased nucleosome arrays in the gene body and a sharper peak of nucleosome-  
303 free DNA in the promoter when compared to unexpressed protein-coding genes, in line with  
304 previous studies (Fig. 5B-C) (Li et al., 2014; Zhang et al., 2015). In terms of the different genotypes



305 analyzed, rH4 plants displayed highly similar nucleosome positioning patterns to Col as expected.  
306 In contrast, while rH4R17A, *arid5*, and *rlt1/2* mutants displayed the same general pattern of lower  
307 nucleosome density upstream of the TSS and high nucleosome density downstream of the TSS,  
308 these genotypes all exhibited a reduction of evenly spaced nucleosome distributions in the gene  
309 body (Fig. 5A), similar to the pattern reported for the *chr11/17* mutant (Li et al., 2014).  
310 Additionally, we analyzed the nucleosome distribution patterns at genes with expression changes  
311 in rH4R17A, *chr11/17*, *rlt1/2*, and/or *arid5* mutants as well as genes without expression changes  
312 in these mutants. We found that the nucleosome distribution patterns at DEGs and non-DEGs were  
313 both affected by the rH4R17A, *arid5*, and *rlt1/2* mutations (Fig. 5D-E), in line with previously  
314 published MNase-seq results for the *chr11/17* mutant (Li et al., 2014). Additionally, nucleosome  
315 distribution patterns at DEGs were affected by the rH4R17A, *arid5*, and *rlt1/2* mutations  
316 regardless of whether the expression of these genes was up- or downregulated (Fig. 5F-G). To  
317 provide a more quantitative assessment of nucleosome spacing in our assays, we calculated the  
318 average change in nucleosome occupancy at the +2 through +6 nucleosome peaks as a measure of  
319 nucleosome phasing. This analysis confirmed that the rH4R17A, *arid5*, and *rlt1/2* mutations  
320 caused a significant reduction in regular nucleosome phasing in gene bodies (Fig. 5H-N). Taken  
321 together, these results indicate that H4R17 positively regulates the action of the ISWI complex to  
322 establish nucleosome arrays in protein-coding genes.

## 323 **Discussion**

### 324 **A novel system for studying histone function in plants**

325 In this study, we present a new histone replacement system that facilitates the analysis of histone  
326 H4 functions on diverse processes in plants. Our results serve as a proof-of-concept that complete  
327 histone replacement systems can be rapidly established in *A. thaliana*. In the future, this approach  
328 may be applied to generate similar systems to study the functions of different histones or histone  
329 variants. The histone replacement system developed in this study for histone H4 will supplement  
330 already existing systems in *S. cerevisiae* and *D. melanogaster* to offer new biological insights into  
331 the roles of H4 in plants. In its current iteration, our methodology already provides the most  
332 extensive coverage of H4 mutants in a multicellular eukaryote, as the histone replacement system  
333 generated in *D. melanogaster* has only been used to generate 14 H4 point mutants (Zhang et al.,  
334 2019), compared to the 63 H4 point mutants generated with our system, which will be made  
335 available through the Arabidopsis Biological Resource Center (ABRC).

336 Our CRISPR-based strategy to replace endogenous histones offers several advantages over other  
337 methods that can potentially be used to achieve complete histone replacement. For example, the  
338 successful generation of the H4 septuple mutant in two generations in this work demonstrates that  
339 multiplex CRISPR/Cas9 can be used to efficiently inactivate a large number of histone genes in  
340 plants (LeBlanc et al., 2017). Using CRISPR/Cas9 greatly reduces the amount of time and  
341 resources required to generate a histone depletion background, especially when compared to  
342 crossing individual histone mutants. The presence of tandem duplicated copies of histone genes  
343 (e.g. the H3.1 genes *At5g10390* and *At5g10400*) can also preclude using traditional crossing  
344 schemes to generate backgrounds lacking a specific histone or histone variant. In addition,  
345 deploying multiplex CRISPR/Cas9 to inactivate endogenous histones will allow researchers to  
346 rapidly re-establish histone replacement systems in a particular mutant background, for example,  
347 to screen for point mutations in histones that enhance or suppress a phenotype of interest. Another  
348 advantage of our histone H4 replacement strategy is that we consistently observed high expression  
349 of the H4 replacement gene, which rescues the morphological phenotype of the H4 septuple  
350 background in all of our T1 lines (Fig. 1A-C). Several factors could contribute to this phenomenon.  
351 While T-DNA integration into the *A. thaliana* genome occurs randomly, selection pressure appears  
352 to shift the recovery of T-DNA insertions into more transcriptionally active chromatin regions

353 (Alonso et al., 2003; Brunaud et al., 2002; Kim et al., 2007; Konecz et al., 1989; Szabados et al.,  
354 2002). Moreover, dosage compensation mechanisms acting to up-regulate the expression of the  
355 endogenous histone H4 gene *At3g53730*, as seen in this study (Fig. 1C), may also act on the histone  
356 H4 replacement gene, as the expression of both of these genes is driven by the native *At3g53730*  
357 promoter. Histone dosage compensation has also been observed in the histone replacement systems  
358 implemented in the multicellular eukaryote *D. melanogaster* (McKay et al., 2015; Zhang et al.,  
359 2019). These histone dosage compensation mechanisms may be related to the recently described  
360 process of transcriptional adaptation, in which mutant mRNA decay causes the upregulation of  
361 related genes (El-Brolosy et al., 2019; Seroby et al., 2020). For both of the above reasons,  
362 transgenic plants lacking endogenous H4 proteins are observed, and therefore, rH4 plants  
363 expressing exclusively mutant histones can predictably be obtained using our strategy.

364 Several changes could be implemented to improve future histone replacement systems in *A.*  
365 *thaliana* and other plants. To control for differential effects caused by random T-DNA integration  
366 (Gelvin, 2017), we characterized in this study two independent transgenic lines expressing each  
367 H4 replacement construct. Ideally, gene targeting would be utilized to introduce the H4 mutations  
368 directly at an endogenous histone H4 locus. While gene targeting technologies in plants currently  
369 have very low efficiency compared to yeast and animal systems, as additional improvements in  
370 gene targeting are developed, *in situ* histone replacement systems in plants analogous to platforms  
371 already existing in yeast and *Drosophila melanogaster* may also become feasible. Additionally,  
372 more precise control over the dosage of the replacement histone could also serve to improve this  
373 method. It was recently shown that while yeast histone replacement systems utilizing single-copy  
374 integrated histone genes expressing certain mutant histones cannot survive, the addition of a  
375 second copy of the mutant histone gene rescues this lethality (Jiang et al., 2017). In the system  
376 described here, we utilized a single endogenous histone H4 gene for the H4 replacement gene,  
377 rather than generating eight histone H4 replacement genes corresponding to each endogenous  
378 histone H4 gene present in the *A. thaliana* genome. While we observed that our rH4 plants appear  
379 morphologically wild-type due to high H4 expression, it may be important to study the function  
380 of the other endogenous H4 genes, or the requirement for *A. thaliana* to have eight copies of the  
381 H4 genes in its genome. Although labor-intensive, future strategies simultaneously using multiple

382 endogenous H4 genes as H4 replacement genes could therefore be more reflective of the H4 supply  
383 available to wild-type plants.

#### 384 **H4R17 regulates nucleosome remodeling and developmental processes in plants**

385 This study has identified a novel role for H4R17 in regulating multiple developmental processes  
386 in *A. thaliana*, including leaf development, fruit development and flowering. Our findings suggest  
387 that this role for H4R17 is not mediated via post-translational modification of this residue. Based  
388 on our results, we propose a model similar to that of animal systems where H4R17 regulates  
389 developmental processes in plants through its regulation of the ISWI complex (Fig. 6) (Clapier et  
390 al., 2001; Clapier et al., 2002; Dann et al., 2017; Fazzio et al., 2005; Hamiche et al., 2001). In wild-  
391 type plants, H4R17 positively regulates the ISWI complex to slide nucleosomes and adequately  
392 establish the nucleosome positioning patterns in the gene bodies of protein-coding genes (Fig. 6).  
393 In rH4R17A mutant plants however, the positive regulation of ISWI by histone H4 is impaired so  
394 that evenly-spaced nucleosome distributions are no longer observed in gene bodies. The altered  
395 nucleosome positioning patterns in gene bodies and the large-scale transcriptional changes in turn  
396 cause the observed pleiotropic developmental phenotypes. Comparative analysis of the protein  
397 sequence of the ISWI catalytic subunits in *A. thaliana* (CHR11 and CHR17) reveals strict  
398 conservation of the amino acids involved in making contacts with histone H4 arginine 17 in the  
399 ISWI orthologs from other species (Supp. Fig. 10) (Yan et al., 2016; Yan et al., 2019), which  
400 supports the findings of this study. Additionally, homology modeling of CHR11 indicates  
401 structural conservation of the H4R17-binding region in plant ISWI proteins (Supp. Fig. 11).  
402 Interestingly, while transcription and nucleosome positioning have been shown to be highly  
403 interconnected processes (Hughes et al., 2012; Jiang and Pugh, 2009; Struhl and Segal, 2013;  
404 Workman and Kingston, 1998), we and others have observed that mutations in H4R17 and plant  
405 ISWI complex subunits affect nucleosome positioning patterns in both differentially and non-  
406 differentially expressed genes (Li et al., 2014). Our results support previous work demonstrating  
407 that it is unlikely that the nucleosome positioning defects in ISWI mutants are caused by the  
408 transcriptional changes observed in these backgrounds (Li et al., 2014; Luo et al., 2020). Moreover,  
409 our results are consistent with the idea that many factors on top of nucleosome positioning in gene  
410 bodies affect the transcription level of a gene, and thus in some cases, altered genic nucleosome  
411 positioning appears to majorly impact transcription, while in others, little change is observed (Bai

412 and Morozov, 2010; Jiang and Pugh, 2009). Additionally, processes related to genetic robustness  
413 may also serve to counteract transcriptional fluctuations due to perturbations of nucleosome  
414 positioning (Masel and Siegal, 2009). For these reasons, we observed independence between the  
415 nucleosome positioning and transcriptional phenotypes of rH4R17A and ISWI mutants.

416 ISWI chromatin remodeling complexes contain between two and four subunits in eukaryotes,  
417 including a conserved ATPase catalytic subunit and at least one accessory subunit (Aydin et al.,  
418 2014; Clapier and Cairns, 2009; Corona and Tamkun, 2004). Multiple types of ISWI complexes  
419 have been identified in animals, and the different accessory subunits in these complexes have been  
420 proposed to modulate the activity of the shared catalytic subunit as well as the specificity and target  
421 recognition of the complex (Aydin et al., 2014; Lusser et al., 2005; Toto et al., 2014). In plants,  
422 there are three types of ISWI complexes that have been identified: the plant-specific CHR11/17-  
423 RLT1/2-ARID5 (CRA)-type complex, the CHR11/17-DDP1/2/3-MSI3 (CDM)-type complex, and  
424 the CHR11/17-DDR1/3/4/5-DDW1 (CDD)-type complex (Tan et al., 2020). In addition, the shared  
425 ISWI catalytic subunits CHR11 and CHR17 were also recently demonstrated to act as accessory  
426 subunits of the SWR1 chromatin remodeling complex in plants (Luo et al., 2020). Given that there  
427 are multiple types of ISWI complexes in plants, we demonstrated that mutations in the CRA-type  
428 complex demonstrate a less severe impact on nucleosome positioning than rH4R17A mutations,  
429 which is in line with the model that H4R17 regulates all three types of ISWI complexes through  
430 its interaction with the catalytic subunits CHR11 and CHR17 (Clapier et al., 2001; Clapier et al.,  
431 2002; Dann et al., 2017; Fazzio et al., 2005; Hamiche et al., 2001). Further characterization of the  
432 different ISWI complexes in plants, including their different targeting specificities to chromatin  
433 loci and the impact of the other identified CDM-type and CDD-type complexes on the regulation  
434 of global transcription and nucleosome positioning, will contribute to elucidating their specific  
435 consequences on chromatin regulation.

## 436 **Materials and Methods**

### 437 **Plant materials**

438 All *Arabidopsis* plants were derived from the Columbia ecotype and grown in Pro-Mix BX  
439 Mycorrhizae soil under cool-white fluorescent lights (approximately  $100 \mu\text{mol m}^{-2} \text{s}^{-1}$ ). Seeds  
440 were surface-sterilized with a 70% ethanol, 0.1% Triton solution for 5 minutes, and then with 95%  
441 ethanol for one minute. Seeds were spread on sterilized paper and plated on 0.5% Murashige-  
442 Skoog (MS) plates. Seeds were stratified in the dark at 4°C for 2 to 4 days, transferred to the  
443 growth chamber for 5 days, and then transplanted to soil. Plants grown in long-day conditions were  
444 grown for 16 h light/ 8 h dark, and plants grown in short-day conditions were grown for 8 h light/  
445 16 h dark.

446 The *chr11* (GK-424F01)/ *chr17* (GK-424F04) double mutant was described previously (Li et al.,  
447 2012). The *arid5* (SALK\_111627), *prmt7-1* (SALK\_028160), and *prmt7-2* (SALK\_039529) T-  
448 DNA insertion mutants were obtained from the Arabidopsis Biological Resource Center. The *piel*  
449 T-DNA insertion mutants were initially obtained from the Arabidopsis Biological Resource Center  
450 (SALK\_096434) and the *piel* mutants used in this study were seeds collected from homozygous  
451 *piel* plants. The *rtl1* (SALK\_099250)/ *rtl2* (SALK\_132828) double mutants were generated by  
452 crossing. Due to severely reduced fertility, *chr11/17* and *arid5* mutants were maintained in a  
453 heterozygous state.

### 454 **Generation of transgenic *Arabidopsis* plants**

455 Binary vectors were transformed into *Agrobacterium tumefaciens* (strain GV3101) using heat  
456 shock and plants were transformed with these constructs using the floral dip procedure as described  
457 previously (Clough and Bent, 1998). Transgenic plants for generation of the H4 septuple mutant  
458 were selected on 0.5 MS plates containing 1% sucrose, carbenicillin ( $200 \mu\text{g ml}^{-1}$ ) and kanamycin  
459 ( $100 \mu\text{g ml}^{-1}$ ). Transgenic rH4 plants were selected on 0.5 MS plates containing 1% sucrose,  
460 carbenicillin ( $200 \mu\text{g ml}^{-1}$ ) and glufosinate ammonium ( $25 \mu\text{g ml}^{-1}$ ). Plants were subjected to heat  
461 stress treatments as described previously (LeBlanc et al., 2017). The plants were grown  
462 continuously at 22°C from that point on.

### 463 **Flowering time and rosette measurements**

464 Days to flower was measured when a 1 cm bolting stem was visible. Rosette leaves were counted  
465 at day of flowering. Rosette area was measured using the ARADEEPOPSIS workflow (Huther et  
466 al., 2020).

### 467 **Dimensionality reduction and clustering**

468 Principal component analysis of four variables (day number in long-day, leaf number in long-day,  
469 day number in short-day, and leaf number in short-day) was performed. We centered variables at  
470 mean 0 and set the standard deviation to 1. *k*-means clustering was performed 40 times with  
471 random initializations on the first two principal components to identify three clusters. Analyses  
472 were performed in RStudio with R version 3.6.1 (Team, 2018).

### 473 **Plasmid construction**

474 CRISPR constructs used to generate the H4 septuple mutant were inserted into the *pYAO-Cas9-*  
475 *SK* vector as described previously (Yan et al., 2015).

476 The H4 replacement plasmid was made by amplifying the promoter (967 bp upstream of start  
477 codon), gene body, and terminator (503 bp downstream of stop codon) of H4 (*At3g53730*) into  
478 pENTR/D (ThermoFisher Scientific, Waltham, MA, USA). Site-directed mutagenesis of *pH4::H4*  
479 in pENTR/D using QuikChange II XL (Agilent Technologies, Santa Clara, CA, USA) was first  
480 performed to create plasmids with 10 silent mutations in the H4 coding sequence. These silent  
481 mutations were engineered to test the resistance of the H4 replacement gene against multiple  
482 gRNAs. Additional site-directed mutagenesis of this vector was performed to generate a library of  
483 63 H4 point mutant genes.

484 Each *pH4::H4* sequence was then transferred into the binary vector pB7WG, containing the H4  
485 gRNA, using Gateway Technology. The binary vector pB7WG containing the H4 gRNA was  
486 generated as follows: The AtU6-26-gRNA vector containing the gRNA targeting H4 (*At3g53730*)



487 was first digested with the restriction enzymes *SpeI* and *NheI*, and the digestion products were run  
488 on a 1% agarose gel. Then, the band containing the H4 gRNA was cut out and ligated into the  
489 binary vector pB7WG, which had been digested with the restriction enzyme *SpeI*.

490 The *PRMT7* overexpression construct was created by cloning the genomic *PRMT7* gene (from  
491 ATG to stop codon, including introns) into pDONR207, and then subcloning the gene into  
492 pMDC32 (Curtis and Grossniklaus, 2003).

### 493 **DNA extraction, PCR and sequencing analyses**

494 Genomic DNA was extracted from *Arabidopsis* plants by grinding one leaf in 500 µl of Extraction  
495 Buffer (200 mM of Tris-HCl pH8.0, 250 mM NaCl, 25 mM ethylenediaminetetraacetic acid  
496 (EDTA) and 1% SDS). Phenol/chloroform (50 µl) was added and tubes were vortexed, followed  
497 by centrifugation for 10 min at 3220g. The supernatant was transferred to a new tube and 70 µl of  
498 isopropanol was added, followed by centrifugation for 10 min at 3200g. The supernatant was  
499 removed and the DNA pellets were resuspended in 100 µl of water.

500 PCR products were sequenced and analyzed using Sequencher 5.4.6 (Gene Codes Corporation,  
501 Ann Arbor, MI, United States) to identify CRISPR-induced mutations. To assess the rate of  
502 mutation of the remaining endogenous H4 gene (*At3g53730*) in rH4 plants by the gRNA in the H4  
503 replacement plasmid, endogenous H4 PCR products were cloned into TOPO TA cloning vectors  
504 (Invitrogen, Carlsbad, CA, United States). Ten to sixteen individual clones corresponding to each  
505 plant were sequenced.

### 506 **RT-qPCR**

507 RNA was extracted from 4-week-old leaf tissue with TRIzol (Invitrogen) and DNase treated using  
508 RQ1 RNase-Free DNase (Promega, Madison, WI, USA). Three biological replicates (different  
509 plants sampled simultaneously) were assessed. SuperScript II Reverse Transcriptase (Invitrogen)  
510 was used to produce cDNA. Reverse transcription was initiated using random hexamers (Applied  
511 Biosystems, Foster City, CA, United States). Quantification of cDNA was done by real-time PCR



512 using a CFX96 Real-Time PCR Detection System (Bio-Rad, Hercules, CA, USA) with KAPA  
513 SYBR FAST qPCR Master Mix (2x) Kit (Kapa Biosystems, Wilmington, MA, USA). Relative  
514 quantities were determined by using a comparative  $C_t$  method as follows: Relative  
515 quantity =  $2^{-((C_t \text{ GOI unknown} - C_t \text{ normalizer unknown}) - (C_t \text{ GOI calibrator} - C_t \text{ normalizer calibrator}))}$ , where GOI is the  
516 gene of interest (Livak and Schmittgen, 2001). Actin was used as the normalizer.

### 517 **Next-generation sequencing library preparation**

518 RNA-seq and MNase-seq libraries were prepared at the Yale Center for Genome Analysis (YCGA).  
519 Leaves of 4-week-old plants grown in short-day conditions were frozen in liquid nitrogen, ground  
520 with a mortar and pestle, and then RNA was extracted using the RNeasy Plant Mini Kit (Qiagen,  
521 Hilden, Germany). RNA quality was confirmed through analysis of Agilent Bioanalyzer 2100  
522 electropherograms (Supp. Fig. 7). Library preparation was performed using Illumina's TruSeq  
523 Stranded Total RNA with Ribo-Zero Plant in which samples were normalized with a total RNA  
524 input of 1  $\mu$ g and library amplification with 8 PCR cycles. MNase-digested DNA was collected as  
525 described previously (Pajoro et al., 2018) with the following modifications: 2 g of leaf tissue from  
526 4-week-old plants grown in short-day conditions was ground in liquid nitrogen and resuspended  
527 in 20 ml of lysis buffer for 15 minutes at 4°C. The resulting slurry was filtered through a 40  $\mu$ m  
528 cell strainer into a 50 ml tube. Samples were centrifuged for 20 minutes at 3200g. The resulting  
529 pellets were resuspended in 10 ml of HBB buffer and centrifuged for 10 minutes at 1500g. Pellets  
530 were successively washed in 5 ml wash buffer and 5 ml reaction buffer. MNase-seq library  
531 preparation was performed using the KAPA Hyper Library Preparation kit (KAPA Biosystems,  
532 Part#KK8504). For each biological replicate, pooled leaf tissue collected simultaneously from  
533 three different plants was used. Libraries were validated using Agilent Bioanalyzer 2100 Hisense  
534 DNA assay and quantified using the KAPA Library Quantification Kit for Illumina® Platforms  
535 kit. Sequencing was done on an Illumina NovaSeq 6000 using the S4 XP workflow.

### 536 **RNA-seq processing and analysis**

537 Two independent biological replicates for Col, rH4-1, rH4-2, rH4R17A-1, rH4R17A-2, *arid5*,  
538 *rtl1/2*, *chr11/17*, and *piel* were sequenced. Paired-end reads were filtered and trimmed using Trim

539 Galore! (version 0.5.0) with default options for quality  
540 (<https://github.com/FelixKrueger/TrimGalore>). The resulting data sets were aligned to the  
541 Araport11 genome (Cheng et al., 2017) using STAR (version 2.7.2a) allowing 2 mismatches (--  
542 outFilterMismatchNmax 2) (Dobin et al., 2013). Statistics for mapping and coverage of the RNA-  
543 seq data are provided in Supplemental Data Set 1. Protein-coding genes were defined as described  
544 in the Araport11 genome annotation (Cheng et al., 2017). The program featureCounts (version  
545 1.6.4) (-M --fraction) (Liao et al., 2014) was used to count the paired-end fragments overlapping  
546 with the annotated protein-coding genes. Differential expression analysis of protein-coding genes  
547 was performed using DESeq2 version 1.26 (Love et al., 2014) on raw read counts to obtain  
548 normalized fold changes and *Padj*-values for each gene. Genes were considered to be differentially  
549 expressed if they showed  $>\pm 2$ -fold-change and *Padj*-value  $< 0.05$ . Differentially expressed genes  
550 are described in Supplemental Data Set 2. Venn diagrams, correlation plots and correlation  
551 matrices were plotted using RStudio with R version 3.6.1 (Team, 2018). Heatmaps were plotted  
552 with the pheatmap package (version 1.0.12) in RStudio using default clustering parameters on  
553 rows and columns. Consistency between biological replicates was confirmed by Spearman  
554 correlation using deepTools2 (version 2.7.15) (Supp. Fig. 8) (Ramirez et al., 2016). deepTools2  
555 was used to generate bam coverage profiles for visualization with Integrative Genomics Viewer  
556 version 2.8.9 (Robinson et al., 2011).

### 557 **MNase-seq processing and analysis**

558 Two independent biological replicates for Col, rH4-2, rH4R17A-1, *arid5*, and *rtl1/2* were  
559 sequenced. Paired-end reads were filtered and trimmed using Trim Galore! (version 0.5.0) with  
560 default options for quality (<https://github.com/FelixKrueger/TrimGalore>). Bowtie2 version 2.4.2  
561 (Langmead and Salzberg, 2012) was used to align the reads to the Araport11 genome (Cheng et  
562 al., 2017) with the --very-sensitive parameter. Statistics for mapping and coverage of the MNase-  
563 seq data are provided in Supplemental Data Set 1. Duplicate reads were removed using Picard  
564 toolkit version 2.9.0 (toolkit., 2019) (MarkDuplicates with *REMOVE\_DUPLICATES=true*) and  
565 the insertion size was filtered from 140 bp to 160 bp using SAMtools version 1.11 (Li et al., 2009).  
566 The average nucleosome occupancy corresponding to the regions 1-kb upstream and downstream  
567 of the TSS of all protein-coding genes was calculated using the bamCoverage (--MNase parameter

568 specified) and computeMatrix functions of deepTools2 version 2.7.15 (Ramirez et al., 2016).  
569 Normalization was performed by scaling with the effective library size calculated by the  
570 calcNormFactors function using edgeR version 3.28.1 (Robinson et al., 2010). Consistency  
571 between biological replicates was confirmed by Spearman correlation using deepTools2 (Supp.  
572 Fig. 9). Fold change in  $\Delta$ Nucleosome Occupancy of +2 through +6 nucleosome peaks relative to  
573 Col was calculated with a custom Python script ([https://github.com/etc27/MNaseseq-](https://github.com/etc27/MNaseseq-workflow/analysis/peak_height)  
574 [workflow/analysis/peak\\_height](https://github.com/etc27/MNaseseq-workflow/analysis/peak_height)) as follows:  $\Delta$ Nucleosome Occupancy = peak maximum – (5'  
575 peak minimum + 3' peak minimum)/2.

### 576 **Model building**

577 The homology model for *Arabidopsis thaliana* CHR11 (a.a. 176-706) was built with Swiss-Model  
578 against the *Myceliophthora thermophila* ISWI reference structure (5JXR) (Biasini et al., 2014;  
579 Yan et al., 2016).

### 580 **Primers**

581 All primers used in this study are listed in Supplemental Data Set 3 (Dong et al., 2021; Richter et  
582 al., 2019; Wu et al., 2008).

### 583 **Statistical analyses**

584 Statistical analysis data are provided in Supplemental Data Set 4.

### 585 **Data Availability Statement**

586 Raw and processed RNA-seq and MNase-seq data have been deposited in the Gene Expression  
587 Omnibus database with the accession code GSE190317.

## 588 **Accession Numbers**

589 Accession numbers of genes reported in this study include: AT3G53730 (*H4*), AT1G07660 (*H4*),  
590 AT1G07820 (*H4*), AT2G28740 (*H4*), AT3G45930 (*H4*), AT5G59690 (*H4*), AT3G46320 (*H4*),  
591 AT5G59970 (*H4*), AT4G21070 (*BRCAL*), AT1G65480 (*FT*), AT2G45660 (*SOC1*), AT4G16570  
592 (*PRMT7*), AT3G06400 (*CHR11*), AT5G18620 (*CHR17*), AT3G43240 (*ARID5*), AT1G28420  
593 (*RLT1*), AT5G44180 (*RLT2*), AT3G12810 (*PIE1*), AT5G60910 (*FUL*), and AT5G09810  
594 (*ACTIN7*)

## 595 **Supplemental Data**

596 **Supplemental Figure 1: CRISPR/Cas9-induced mutations in the H4 septuple mutant of *A.***  
597 ***thaliana*.**

598 **Supplemental Figure 2: Impact of histone H4 mutations on the floral transition in *A. thaliana*.**

599 **Supplemental Figure 3: Phenotypes of early flowering histone H4 mutants.**

600 **Supplemental Figure 4: No functional relationship between rH4R17A and *PRMT7* mutations.**

601 **Supplemental Figure 5: The effect of ISWI and rH4R17A mutations on the floral transition**  
602 **and development.**

603 **Supplemental Figure 6: Co-regulation of gene expression observed between rH4R17A and**  
604 **ISWI mutants.**

605 **Supplemental Figure 7: Bioanalyzer electropherograms of RNA-seq replicates.**

606 **Supplemental Figure 8: Spearman correlation of RNA-seq replicates.**

607 **Supplemental Figure 9: Spearman correlation of MNase-seq replicates.**

608 **Supplemental Figure 10: Conservation of ISWI proteins.**

609 **Supplemental Figure 11: Homology model of *Arabidopsis thaliana* CHR11.**

610 **Supplemental Data Set 1: Statistics for mapping and coverage of the NGS data.**

611 **Supplemental Data Set 2: Differentially Expressed Genes identified in RNA-seq.**

612 **Supplemental Data Set 3. Cloning and PCR primers.**

613 **Supplemental Data Set 4. Statistical analysis data.**

## 614 **Acknowledgments**

615 We thank all current and former members of our lab for discussions and advice during the course  
616 of this work. We especially acknowledge the contributions of Anisa Iqbal, Benoit Mermaz and  
617 Gonzalo Villarino. We acknowledge Christopher Bolick and his staff at Yale for help with plant  
618 growth and maintenance and we thank the Yale Science Building Facilities Staff for maintenance  
619 of the lab facilities. We thank Franziska Bleichert from Yale University for her assistance with  
620 structural analyses. This project was supported by grant #R35GM128661 from the National  
621 Institutes of Health to Y.J. E.T.C. was supported by a Yale University Gruber Science Fellowship,  
622 the NIH Predoctoral Program in Cellular and Molecular Biology Training Grant T32GM007233,  
623 and the National Science Foundation Graduate Research Fellowship #2139841. U.V.P. was  
624 supported by a grant from National Institutes of Health R35GM125003. We thank Paja Sijacic and  
625 Roger Deal from Emory University for their generous gift of *piel* seeds. We thank Lin Xu and Wu  
626 Liu from the National Laboratory of Plant Molecular Genetics, Shanghai Institute of Plant  
627 Physiology and Ecology, Shanghai Institutes for Biological Sciences, Chinese Academy of  
628 Sciences for their generous gift of *chr11/17* mutant seeds. The authors declare that they have no  
629 competing interests.

## 630 **Author Contributions**

631 Y.J. and E.T.C. designed the experiments. E.T.C. and Y.J. wrote the paper with contributions from  
632 C.L. Constructs were generated by E.T.C. Plant transformations were performed by E.T.C., A.S.,  
633 C.L, and Y.J. Genotyping was performed by E.T.C., A.S., M.A.T, C.L, and Y.J. RNA extractions  
634 and RT-qPCR were done by E.T.C., C.L. and Y.J. Flowering time measurements were obtained  
635 by E.T.C., M.A.T. and C.L. Plant pictures were taken by E.T.C., M.A.T., C.L. and Y.J. Some of  
636 the mutants used in this work were generated by Y.H. and U.V.P. C.L. performed the RNA-seq  
637 and MNase-seq experiments. E.T.C. did the bioinformatics analyses of all RNA-seq and MNase-  
638 seq experiments.

639  
640  
641  
642  
643  
644  
645  
646  
647  
648  
649  
650  
651  
652  
653  
654  
655  
656  
657  
658  
659  
660  
661  
662  
663  
664  
665  
666  
667  
668  
669  
670  
671  
672  
673  
674  
675  
676  
677  
678  
679  
680  
681  
682  
683  
684

## References

- Alonso, J.M., Stepanova, A.N., Lisse, T.J., Kim, C.J., Chen, H., Shinn, P., Stevenson, D.K., Zimmerman, J., Barajas, P., Cheuk, R., *et al.* (2003). Genome-wide insertional mutagenesis of *Arabidopsis thaliana*. *Science* *301*, 653-657.
- Andres, F., and Coupland, G. (2012). The genetic basis of flowering responses to seasonal cues. *Nat Rev Genet* *13*, 627-639.
- Aydin, O.Z., Vermeulen, W., and Lans, H. (2014). ISWI chromatin remodeling complexes in the DNA damage response. *Cell Cycle* *13*, 3016-3025.
- Bai, L., and Morozov, A.V. (2010). Gene regulation by nucleosome positioning. *Trends Genet* *26*, 476-483.
- Bastow, R., Mylne, J.S., Lister, C., Lippman, Z., Martienssen, R.A., and Dean, C. (2004). Vernalization requires epigenetic silencing of FLC by histone methylation. *Nature* *427*, 164-167.
- Berry, S., and Dean, C. (2015). Environmental perception and epigenetic memory: mechanistic insight through FLC. *Plant J* *83*, 133-148.
- Biasini, M., Bienert, S., Waterhouse, A., Arnold, K., Studer, G., Schmidt, T., Kiefer, F., Gallo Cassarino, T., Bertoni, M., Bordoli, L., *et al.* (2014). SWISS-MODEL: modelling protein tertiary and quaternary structure using evolutionary information. *Nucleic Acids Res* *42*, W252-258.
- Brunaud, V., Balzergue, S., Dubreucq, B., Aubourg, S., Samson, F., Chauvin, S., Bechtold, N., Cruaud, C., DeRose, R., Pelletier, G., *et al.* (2002). T-DNA integration into the *Arabidopsis* genome depends on sequences of pre-insertion sites. *EMBO Rep* *3*, 1152-1157.
- Bu, Z., Yu, Y., Li, Z., Liu, Y., Jiang, W., Huang, Y., and Dong, A.W. (2014). Regulation of *Arabidopsis* flowering by the histone mark readers MRG1/2 via interaction with CONSTANS to modulate FT expression. *PLoS Genet* *10*, e1004617.
- Cheng, C.Y., Krishnakumar, V., Chan, A.P., Thibaud-Nissen, F., Schobel, S., and Town, C.D. (2017). Araport11: a complete reannotation of the *Arabidopsis thaliana* reference genome. *Plant J* *89*, 789-804.
- Clapier, C.R., and Cairns, B.R. (2009). The biology of chromatin remodeling complexes. *Annu Rev Biochem* *78*, 273-304.
- Clapier, C.R., Langst, G., Corona, D.F., Becker, P.B., and Nightingale, K.P. (2001). Critical role for the histone H4 N terminus in nucleosome remodeling by ISWI. *Mol Cell Biol* *21*, 875-883.
- Clapier, C.R., Nightingale, K.P., and Becker, P.B. (2002). A critical epitope for substrate recognition by the nucleosome remodeling ATPase ISWI. *Nucleic Acids Res* *30*, 649-655.
- Clough, S.J., and Bent, A.F. (1998). Floral dip: a simplified method for *Agrobacterium*-mediated transformation of *Arabidopsis thaliana*. *Plant J* *16*, 735-743.
- Corona, D.F., and Tamkun, J.W. (2004). Multiple roles for ISWI in transcription, chromosome organization and DNA replication. *Biochim Biophys Acta* *1677*, 113-119.
- Crevillen, P., Gomez-Zambrano, A., Lopez, J.A., Vazquez, J., Pineiro, M., and Jarillo, J.A. (2019). *Arabidopsis* YAF9 histone readers modulate flowering time through NuA4-complex-dependent H4 and H2A.Z histone acetylation at FLC chromatin. *New Phytol* *222*, 1893-1908.
- Crevillen, P., Yang, H., Cui, X., Greeff, C., Trick, M., Qiu, Q., Cao, X., and Dean, C. (2014). Epigenetic reprogramming that prevents transgenerational inheritance of the vernalized state. *Nature* *515*, 587-590.
- Cui, X., Lu, F., Qiu, Q., Zhou, B., Gu, L., Zhang, S., Kang, Y., Cui, X., Ma, X., Yao, Q., *et al.* (2016). REF6 recognizes a specific DNA sequence to demethylate H3K27me3 and regulate organ boundary formation in *Arabidopsis*. *Nat Genet* *48*, 694-699.



- 685 Curtis, M.D., and Grossniklaus, U. (2003). A gateway cloning vector set for high-throughput  
686 functional analysis of genes in planta. *Plant Physiol* 133, 462-469.
- 687 Dai, J., Hyland, E.M., Yuan, D.S., Huang, H., Bader, J.S., and Boeke, J.D. (2008). Probing  
688 nucleosome function: a highly versatile library of synthetic histone H3 and H4 mutants. *Cell* 134,  
689 1066-1078.
- 690 Dann, G.P., Liszczak, G.P., Bagert, J.D., Muller, M.M., Nguyen, U.T.T., Wojcik, F., Brown,  
691 Z.Z., Bos, J., Panchenko, T., Pihl, R., *et al.* (2017). ISWI chromatin remodellers sense  
692 nucleosome modifications to determine substrate preference. *Nature* 548, 607-611.
- 693 Deng, W., Liu, C., Pei, Y., Deng, X., Niu, L., and Cao, X. (2007). Involvement of the histone  
694 acetyltransferase AtHAC1 in the regulation of flowering time via repression of FLOWERING  
695 LOCUS C in Arabidopsis. *Plant Physiol* 143, 1660-1668.
- 696 Dobin, A., Davis, C.A., Schlesinger, F., Drenkow, J., Zaleski, C., Jha, S., Batut, P., Chaisson,  
697 M., and Gingeras, T.R. (2013). STAR: ultrafast universal RNA-seq aligner. *Bioinformatics* 29,  
698 15-21.
- 699 Dong, J., Gao, Z., Liu, S., Li, G., Yang, Z., Huang, H., and Xu, L. (2013). SLIDE, the protein  
700 interacting domain of Imitation Switch remodelers, binds DDT-domain proteins of different  
701 subfamilies in chromatin remodeling complexes. *J Integr Plant Biol* 55, 928-937.
- 702 Dong, J., LeBlanc, C., Poulet, A., Mermaz, B., Villarino, G., Webb, K.M., Joly, V., Mendez, J.,  
703 Voigt, P., and Jacob, Y. (2021). H3.1K27me1 maintains transcriptional silencing and genome  
704 stability by preventing GCN5-mediated histone acetylation. *Plant Cell* 33, 961-979.
- 705 El-Brolosy, M.A., Kontarakis, Z., Rossi, A., Kuenne, C., Gunther, S., Fukuda, N., Kikhi, K.,  
706 Boezio, G.L.M., Takacs, C.M., Lai, S.L., *et al.* (2019). Genetic compensation triggered by  
707 mutant mRNA degradation. *Nature* 568, 193-197.
- 708 Fazio, T.G., Gelbart, M.E., and Tsukiyama, T. (2005). Two distinct mechanisms of chromatin  
709 interaction by the Isw2 chromatin remodeling complex in vivo. *Mol Cell Biol* 25, 9165-9174.
- 710 Feng, Y., Hadjikyriacou, A., and Clarke, S.G. (2014). Substrate specificity of human protein  
711 arginine methyltransferase 7 (PRMT7): the importance of acidic residues in the double E loop. *J*  
712 *Biol Chem* 289, 32604-32616.
- 713 Feng, Y., Maity, R., Whitelegge, J.P., Hadjikyriacou, A., Li, Z., Zurita-Lopez, C., Al-Hadid, Q.,  
714 Clark, A.T., Bedford, M.T., Masson, J.Y., *et al.* (2013). Mammalian protein arginine  
715 methyltransferase 7 (PRMT7) specifically targets RXR sites in lysine- and arginine-rich regions.  
716 *J Biol Chem* 288, 37010-37025.
- 717 Fu, Y., Zhu, Z., Meng, G., Zhang, R., and Zhang, Y. (2021). A CRISPR-Cas9 based shuffle  
718 system for endogenous histone H3 and H4 combinatorial mutagenesis. *Sci Rep* 11, 3298.
- 719 Gelvin, S.B. (2017). Integration of Agrobacterium T-DNA into the Plant Genome. *Annu Rev*  
720 *Genet* 51, 195-217.
- 721 Gkikopoulos, T., Schofield, P., Singh, V., Pinskaya, M., Mellor, J., Smolle, M., Workman, J.L.,  
722 Barton, G.J., and Owen-Hughes, T. (2011). A role for Snf2-related nucleosome-spacing enzymes  
723 in genome-wide nucleosome organization. *Science* 333, 1758-1760.
- 724 Glozak, M.A., Sengupta, N., Zhang, X., and Seto, E. (2005). Acetylation and deacetylation of  
725 non-histone proteins. *Gene* 363, 15-23.
- 726 Govin, J., Dorsey, J., Gaucher, J., Rousseaux, S., Khochbin, S., and Berger, S.L. (2010).  
727 Systematic screen reveals new functional dynamics of histones H3 and H4 during  
728 gametogenesis. *Genes Dev* 24, 1772-1786.
- 729 Gunesdogan, U., Jackle, H., and Herzig, A. (2010). A genetic system to assess in vivo the  
730 functions of histones and histone modifications in higher eukaryotes. *EMBO Rep* 11, 772-776.

- 731 Hamiche, A., Kang, J.G., Dennis, C., Xiao, H., and Wu, C. (2001). Histone tails modulate  
732 nucleosome mobility and regulate ATP-dependent nucleosome sliding by NURF. *Proc Natl Acad*  
733 *Sci U S A* *98*, 14316-14321.
- 734 He, Y. (2009). Control of the transition to flowering by chromatin modifications. *Mol Plant* *2*,  
735 554-564.
- 736 He, Y., and Amasino, R.M. (2005). Role of chromatin modification in flowering-time control.  
737 *Trends Plant Sci* *10*, 30-35.
- 738 He, Y., Doyle, M.R., and Amasino, R.M. (2004). PAF1-complex-mediated histone methylation  
739 of FLOWERING LOCUS C chromatin is required for the vernalization-responsive, winter-  
740 annual habit in Arabidopsis. *Genes Dev* *18*, 2774-2784.
- 741 Hodl, M., and Basler, K. (2009). Transcription in the absence of histone H3.3. *Curr Biol* *19*,  
742 1221-1226.
- 743 Hodl, M., and Basler, K. (2012). Transcription in the absence of histone H3.2 and H3K4  
744 methylation. *Curr Biol* *22*, 2253-2257.
- 745 Hughes, A.L., Jin, Y., Rando, O.J., and Struhl, K. (2012). A functional evolutionary approach to  
746 identify determinants of nucleosome positioning: a unifying model for establishing the genome-  
747 wide pattern. *Mol Cell* *48*, 5-15.
- 748 Huther, P., Schandry, N., Jandrasits, K., Bezrukov, I., and Becker, C. (2020). ARADEEPOPSIS,  
749 an Automated Workflow for Top-View Plant Phenomics using Semantic Segmentation of Leaf  
750 States. *Plant Cell* *32*, 3674-3688.
- 751 Hyland, E.M., Cosgrove, M.S., Molina, H., Wang, D., Pandey, A., Cottee, R.J., and Boeke, J.D.  
752 (2005). Insights into the role of histone H3 and histone H4 core modifiable residues in  
753 *Saccharomyces cerevisiae*. *Mol Cell Biol* *25*, 10060-10070.
- 754 Jain, K., and Clarke, S.G. (2019). PRMT7 as a unique member of the protein arginine  
755 methyltransferase family: A review. *Arch Biochem Biophys* *665*, 36-45.
- 756 Jiang, C., and Pugh, B.F. (2009). Nucleosome positioning and gene regulation: advances through  
757 genomics. *Nat Rev Genet* *10*, 161-172.
- 758 Jiang, D., Wang, Y., Wang, Y., and He, Y. (2008). Repression of FLOWERING LOCUS C and  
759 FLOWERING LOCUS T by the Arabidopsis Polycomb repressive complex 2 components. *PLoS*  
760 *One* *3*, e3404.
- 761 Jiang, S., Liu, Y., Wang, A., Qin, Y., Luo, M., Wu, Q., Boeke, J.D., and Dai, J. (2017).  
762 Construction of Comprehensive Dosage-Matching Core Histone Mutant Libraries for  
763 *Saccharomyces cerevisiae*. *Genetics* *207*, 1263-1273.
- 764 Kim, S.I., Veena, and Gelvin, S.B. (2007). Genome-wide analysis of Agrobacterium T-DNA  
765 integration sites in the Arabidopsis genome generated under non-selective conditions. *Plant J* *51*,  
766 779-791.
- 767 Kim, S.Y., He, Y., Jacob, Y., Noh, Y.S., Michaels, S., and Amasino, R. (2005). Establishment of  
768 the vernalization-responsive, winter-annual habit in Arabidopsis requires a putative histone H3  
769 methyl transferase. *Plant Cell* *17*, 3301-3310.
- 770 Koncz, C., Martini, N., Mayerhofer, R., Koncz-Kalman, Z., Korber, H., Redei, G.P., and Schell,  
771 J. (1989). High-frequency T-DNA-mediated gene tagging in plants. *Proc Natl Acad Sci U S A*  
772 *86*, 8467-8471.
- 773 Kouzarides, T. (2007). Chromatin modifications and their function. *Cell* *128*, 693-705.
- 774 Langmead, B., and Salzberg, S.L. (2012). Fast gapped-read alignment with Bowtie 2. *Nat*  
775 *Methods* *9*, 357-359.



776 Larkin, M.A., Blackshields, G., Brown, N.P., Chenna, R., McGettigan, P.A., McWilliam, H.,  
777 Valentin, F., Wallace, I.M., Wilm, A., Lopez, R., *et al.* (2007). Clustal W and Clustal X version  
778 2.0. *Bioinformatics* 23, 2947-2948.

779 LeBlanc, C., Zhang, F., Mendez, J., Lozano, Y., Chatpar, K., Irish, V., and Jacob, Y. (2017).  
780 Increased efficiency of targeted mutagenesis by CRISPR/Cas9 in plants using heat stress. *Plant J.*  
781 Li, G., Liu, S., Wang, J., He, J., Huang, H., Zhang, Y., and Xu, L. (2014). ISWI proteins  
782 participate in the genome-wide nucleosome distribution in Arabidopsis. *Plant J* 78, 706-714.

783 Li, G., Zhang, J., Li, J., Yang, Z., Huang, H., and Xu, L. (2012). Imitation Switch chromatin  
784 remodeling factors and their interacting RINGLET proteins act together in controlling the plant  
785 vegetative phase in Arabidopsis. *Plant J* 72, 261-270.

786 Li, H., Handsaker, B., Wysoker, A., Fennell, T., Ruan, J., Homer, N., Marth, G., Abecasis, G.,  
787 Durbin, R., and Genome Project Data Processing, S. (2009). The Sequence Alignment/Map  
788 format and SAMtools. *Bioinformatics* 25, 2078-2079.

789 Liao, Y., Smyth, G.K., and Shi, W. (2014). featureCounts: an efficient general purpose program  
790 for assigning sequence reads to genomic features. *Bioinformatics* 30, 923-930.

791 Lifton, R.P., Goldberg, M.L., Karp, R.W., and Hogness, D.S. (1978). The organization of the  
792 histone genes in *Drosophila melanogaster*: functional and evolutionary implications. *Cold Spring*  
793 *Harb Symp Quant Biol* 42 Pt 2, 1047-1051.

794 Livak, K.J., and Schmittgen, T.D. (2001). Analysis of relative gene expression data using real-  
795 time quantitative PCR and the  $2^{-\Delta\Delta C(T)}$  Method. *Methods* 25, 402-408.

796 Love, M.I., Huber, W., and Anders, S. (2014). Moderated estimation of fold change and  
797 dispersion for RNA-seq data with DESeq2. *Genome Biol* 15, 550.

798 Ludwigsen, J., Pfennig, S., Singh, A.K., Schindler, C., Harrer, N., Forne, I., Zacharias, M., and  
799 Mueller-Planitz, F. (2017). Concerted regulation of ISWI by an autoinhibitory domain and the  
800 H4 N-terminal tail. *Elife* 6.

801 Luger, K., Mader, A.W., Richmond, R.K., Sargent, D.F., and Richmond, T.J. (1997). Crystal  
802 structure of the nucleosome core particle at 2.8 Å resolution. *Nature* 389, 251-260.

803 Luo, Y.X., Hou, X.M., Zhang, C.J., Tan, L.M., Shao, C.R., Lin, R.N., Su, Y.N., Cai, X.W., Li,  
804 L., Chen, S., *et al.* (2020). A plant-specific SWR1 chromatin-remodeling complex couples  
805 histone H2A.Z deposition with nucleosome sliding. *EMBO J* 39, e102008.

806 Lusser, A., Urwin, D.L., and Kadonaga, J.T. (2005). Distinct activities of CHD1 and ACF in  
807 ATP-dependent chromatin assembly. *Nat Struct Mol Biol* 12, 160-166.

808 Masel, J., and Siegal, M.L. (2009). Robustness: mechanisms and consequences. *Trends Genet*  
809 25, 395-403.

810 McKay, Daniel J., Klusza, S., Penke, Taylor J.R., Meers, Michael P., Curry, Kaitlin P.,  
811 McDaniel, Stephen L., Malek, Pamela Y., Cooper, Stephen W., Tatomer, Deirdre C., Lieb,  
812 Jason D., *et al.* (2015). Interrogating the Function of Metazoan Histones using Engineered Gene  
813 Clusters. *Developmental Cell* 32, 373-386.

814 Mueller-Planitz, F., Klinker, H., Ludwigsen, J., and Becker, P.B. (2013). The ATPase domain of  
815 ISWI is an autonomous nucleosome remodeling machine. *Nat Struct Mol Biol* 20, 82-89.

816 Nakanishi, S., Sanderson, B.W., Delventhal, K.M., Bradford, W.D., Staehling-Hampton, K., and  
817 Shilatifard, A. (2008). A comprehensive library of histone mutants identifies nucleosomal  
818 residues required for H3K4 methylation. *Nat Struct Mol Biol* 15, 881-888.

819 Ning, Y.Q., Chen, Q., Lin, R.N., Li, Y.Q., Li, L., Chen, S., and He, X.J. (2019). The HDA19  
820 histone deacetylase complex is involved in the regulation of flowering time in a photoperiod-  
821 dependent manner. *Plant J* 98, 448-464.

822 Norris, A., Bianchet, M.A., and Boeke, J.D. (2008). Compensatory interactions between Sir3p  
823 and the nucleosomal LRS surface imply their direct interaction. *PLoS Genet* 4, e1000301.  
824 Okada, T., Endo, M., Singh, M.B., and Bhalla, P.L. (2005). Analysis of the histone H3 gene  
825 family in Arabidopsis and identification of the male-gamete-specific variant AtMGH3. *Plant J*  
826 44, 557-568.  
827 Pajoro, A., Muino, J.M., Angenent, G.C., and Kaufmann, K. (2018). Profiling Nucleosome  
828 Occupancy by MNase-seq: Experimental Protocol and Computational Analysis. *Methods Mol*  
829 *Biol* 1675, 167-181.  
830 Pajoro, A., Severing, E., Angenent, G.C., and Immink, R.G.H. (2017). Histone H3 lysine 36  
831 methylation affects temperature-induced alternative splicing and flowering in plants. *Genome*  
832 *Biol* 18, 102.  
833 Pien, S., Fleury, D., Mylne, J.S., Crevillen, P., Inze, D., Avramova, Z., Dean, C., and  
834 Grossniklaus, U. (2008). ARABIDOPSIS TRITHORAX1 dynamically regulates FLOWERING  
835 LOCUS C activation via histone 3 lysine 4 trimethylation. *Plant Cell* 20, 580-588.  
836 Racki, L.R., Naber, N., Pate, E., Leonard, J.D., Cooke, R., and Narlikar, G.J. (2014). The histone  
837 H4 tail regulates the conformation of the ATP-binding pocket in the SNF2h chromatin  
838 remodeling enzyme. *J Mol Biol* 426, 2034-2044.  
839 Ramirez, F., Ryan, D.P., Gruning, B., Bhardwaj, V., Kilpert, F., Richter, A.S., Heyne, S.,  
840 Dundar, F., and Manke, T. (2016). deepTools2: a next generation web server for deep-  
841 sequencing data analysis. *Nucleic Acids Res* 44, W160-165.  
842 Richter, R., Kinoshita, A., Vincent, C., Martinez-Gallegos, R., Gao, H., van Driel, A.D., Hyun,  
843 Y., Mateos, J.L., and Coupland, G. (2019). Floral regulators FLC and SOC1 directly regulate  
844 expression of the B3-type transcription factor TARGET OF FLC AND SVP 1 at the Arabidopsis  
845 shoot apex via antagonistic chromatin modifications. *PLoS Genet* 15, e1008065.  
846 Robinson, J.T., Thorvaldsdottir, H., Winckler, W., Guttman, M., Lander, E.S., Getz, G., and  
847 Mesirov, J.P. (2011). Integrative genomics viewer. *Nat Biotechnol* 29, 24-26.  
848 Robinson, M.D., McCarthy, D.J., and Smyth, G.K. (2010). edgeR: a Bioconductor package for  
849 differential expression analysis of digital gene expression data. *Bioinformatics* 26, 139-140.  
850 Serobyanyan, V., Kontarakis, Z., El-Brolosy, M.A., Welker, J.M., Tolstenkov, O., Saadeldein, A.M.,  
851 Retzer, N., Gottschalk, A., Wehman, A.M., and Stainier, D.Y. (2020). Transcriptional adaptation  
852 in *Caenorhabditis elegans*. *Elife* 9.  
853 Song, Y.H., Shim, J.S., Kinmonth-Schultz, H.A., and Imaizumi, T. (2015). Photoperiodic  
854 flowering: time measurement mechanisms in leaves. *Annu Rev Plant Biol* 66, 441-464.  
855 Srikanth, A., and Schmid, M. (2011). Regulation of flowering time: all roads lead to Rome. *Cell*  
856 *Mol Life Sci* 68, 2013-2037.  
857 Struhl, K., and Segal, E. (2013). Determinants of nucleosome positioning. *Nat Struct Mol Biol*  
858 20, 267-273.  
859 Szabados, L., Kovacs, I., Oberschall, A., Abraham, E., Kerekes, I., Zsigmond, L., Nagy, R.,  
860 Alvarado, M., Krasovskaja, I., Gal, M., *et al.* (2002). Distribution of 1000 sequenced T-DNA  
861 tags in the Arabidopsis genome. *Plant J* 32, 233-242.  
862 Tan, L.M., Liu, R., Gu, B.W., Zhang, C.J., Luo, J., Guo, J., Wang, Y., Chen, L., Du, X., Li, S., *et*  
863 *al.* (2020). Dual Recognition of H3K4me3 and DNA by the ISWI Component ARID5 Regulates  
864 the Floral Transition in Arabidopsis. *Plant Cell* 32, 2178-2195.  
865 Team, R.C. (2018). R: A language and environment for statistical computing. R Foundation for  
866 Statistical Computing, Vienna, Austria.

867 Tenea, G.N., Spantzel, J., Lee, L.Y., Zhu, Y., Lin, K., Johnson, S.J., and Gelvin, S.B. (2009).  
868 Overexpression of several Arabidopsis histone genes increases agrobacterium-mediated  
869 transformation and transgene expression in plants. *Plant Cell* 21, 3350-3367.  
870 toolkit., B.I.P. (2019). doi:<http://broadinstitute.github.io/picard/>.  
871 Toto, M., D'Angelo, G., and Corona, D.F. (2014). Regulation of ISWI chromatin remodelling  
872 activity. *Chromosoma* 123, 91-102.  
873 Wierzbicki, A.T., and Jerzmanowski, A. (2005). Suppression of histone H1 genes in Arabidopsis  
874 results in heritable developmental defects and stochastic changes in DNA methylation. *Genetics*  
875 169, 997-1008.  
876 Workman, J.L., and Kingston, R.E. (1998). Alteration of nucleosome structure as a mechanism  
877 of transcriptional regulation. *Annu Rev Biochem* 67, 545-579.  
878 Wu, J.F., Wang, Y., and Wu, S.H. (2008). Two new clock proteins, LWD1 and LWD2, regulate  
879 Arabidopsis photoperiodic flowering. *Plant Physiol* 148, 948-959.  
880 Xu, L., Zhao, Z., Dong, A., Soubigou-Taconnat, L., Renou, J.P., Steinmetz, A., and Shen, W.H.  
881 (2008). Di- and tri- but not monomethylation on histone H3 lysine 36 marks active transcription  
882 of genes involved in flowering time regulation and other processes in Arabidopsis thaliana. *Mol*  
883 *Cell Biol* 28, 1348-1360.  
884 Yadon, A.N., and Tsukiyama, T. (2011). SnapShot: Chromatin remodeling: ISWI. *Cell* 144, 453-  
885 453 e451.  
886 Yaish, M.W., Colasanti, J., and Rothstein, S.J. (2011). The role of epigenetic processes in  
887 controlling flowering time in plants exposed to stress. *J Exp Bot* 62, 3727-3735.  
888 Yan, L., Wang, L., Tian, Y., Xia, X., and Chen, Z. (2016). Structure and regulation of the  
889 chromatin remodeller ISWI. *Nature* 540, 466-469.  
890 Yan, L., Wei, S., Wu, Y., Hu, R., Li, H., Yang, W., and Xie, Q. (2015). High-Efficiency Genome  
891 Editing in Arabidopsis Using YAO Promoter-Driven CRISPR/Cas9 System. *Mol Plant* 8, 1820-  
892 1823.  
893 Yan, L., Wu, H., Li, X., Gao, N., and Chen, Z. (2019). Structures of the ISWI-nucleosome  
894 complex reveal a conserved mechanism of chromatin remodeling. *Nat Struct Mol Biol* 26, 258-  
895 266.  
896 Yu, C.W., Liu, X., Luo, M., Chen, C., Lin, X., Tian, G., Lu, Q., Cui, Y., and Wu, K. (2011).  
897 HISTONE DEACETYLASE6 interacts with FLOWERING LOCUS D and regulates flowering  
898 in Arabidopsis. *Plant Physiol* 156, 173-184.  
899 Zhang, T., Zhang, W., and Jiang, J. (2015). Genome-Wide Nucleosome Occupancy and  
900 Positioning and Their Impact on Gene Expression and Evolution in Plants. *Plant Physiol* 168,  
901 1406-1416.  
902 Zhang, W., Zhang, X., Xue, Z., Li, Y., Ma, Q., Ren, X., Zhang, J., Yang, S., Yang, L., Wu, M.,  
903 *et al.* (2019). Probing the Function of Metazoan Histones with a Systematic Library of H3 and  
904 H4 Mutants. *Dev Cell* 48, 406-419 e405.  
905 Zheng, S., Hu, H., Ren, H., Yang, Z., Qiu, Q., Qi, W., Liu, X., Chen, X., Cui, X., Li, S., *et al.*  
906 (2019). The Arabidopsis H3K27me3 demethylase JUMONJI 13 is a temperature and  
907 photoperiod dependent flowering repressor. *Nat Commun* 10, 1303.

## 908 **Figure Legends**

### 909 **Main Figures**

#### 910 **Figure 1: A CRISPR-based genetic system for expression of H4 point mutants in *A. thaliana*.**

911 (A) Morphological phenotypes of Col, H4 septuple mutants, and rH4 plants grown in long-day  
912 conditions at 3.5 weeks (top) and short-day conditions at 7 weeks (bottom). (B) Siliques of Col,  
913 H4 septuple mutants, and rH4 plants grown in long-day conditions for 4 weeks. (C-E) RT-qPCR  
914 of (C) *H4* (*At3g53730*), (D) *BRCA1* and (E) *TSI* in Col, H4 septuple mutants, and four independent  
915 rH4 T1 lines. Three biological replicates were included for Col and H4 septuple mutant plants.  
916 Horizontal bars indicate the mean. SD denoted with error bars. *P*-value from unpaired Student's *t*-  
917 test denoted with asterisks (\**p*<0.05, \*\**p*<0.005, \*\*\**p*<0.0005). (F) Design of the gRNA targeting  
918 the remaining endogenous H4 gene (*At3g53730*) in the H4 septuple mutant. Mismatches of the  
919 replacement H4 gene with the gRNA shown in red. (G) Schematic of point mutations in the H4  
920 replacement plasmid library. (H) Percentage of mutated alleles in six rH4 plants and six rH4K16A  
921 plants. Each plant assessed was from the T2 generation; three plants from the same T1 parent were  
922 used in this experiment (i.e. two independent T1 lines per genotype).

#### 923 **Figure 2: Mutations in specific residues of histone H4 generate early flowering phenotypes**

924 **in *A. thaliana*.** (A) Rosette phenotype of Col, H4 septuple mutant, rH4R17A, rH4R36A, rH4R39A,  
925 and rH4K44A mutants grown in long-day conditions for 3 weeks. For the rH4 plants, individual  
926 T2 plants (top and bottom) from independent T1 parents are shown. (B-C) Mean (B) days to flower  
927 and (C) rosette leaf number at flowering in short-day (SD) conditions for Col, the H4 septuple  
928 mutant, and various H4 replacement backgrounds (two independent transgenic lines each).  
929 Standard deviation shown with error bars (*n*≥7). Letters (a,b,c) indicate cluster identified by *k*-  
930 means clustering. (D) Principal component plot for flowering time data along the first two principal  
931 components, PC1 and PC2. Variance explained by each principal component shown on respective  
932 axis. Three clusters produced by *k*-means clustering represented in blue (Cluster a), orange (Cluster  
933 b), and pink (Cluster c) colors. (E-F) RT-qPCR of (E) *FLC* and (F) *SOCI* in Col, H4 septuple  
934 mutant, rH4-1, rH4-2, rH4K16A-1, rH4K20A-1, rH4R35A-1, rH4R40K-1, rH4R17A-1, and  
935 rH4R39A-1 plants. Standard deviation denoted with error bars. Statistical analyses were performed  
936 using one-way ANOVA with Tukey's HSD post hoc test. *P*-value from Tukey's HSD test

937 (genotype vs. Col) denoted with asterisks (\* $p < 0.05$ , \*\* $p < 0.005$ , \*\*\* $p < 0.0005$ ). Bar colors  
938 represent cluster assignment from (D).

939 **Figure 3: *PRMT7* does not regulate the floral transition in *A. thaliana*.** (A) Rosette phenotype  
940 of Col, rH4-1, rH4-2, rH4R17A-1 and rH4R17A-2 plants grown in long-day conditions at 3 weeks.  
941 (B) Silique phenotype of Col, rH4-1, rH4-2, rH4R17A-1 and rH4R17A-2 plants grown in long-  
942 day conditions at 4 weeks. (C) Gene structure of *PRMT7*. The location of the T-DNA insertions  
943 and the primers (F1-R1 and F2-R2) used for gene expression analyses are shown. (D-F) RT-qPCR  
944 showing *PRMT7* expression in (D-E) Col, *prmt7-1*, and *prmt7-2* plants and (F) Col and  
945 *35S::PRMT7* T1 plants. The average of three biological replicates and standard deviation are  
946 shown for Col and *prmt7* mutants. For the *35S::PRMT7* plants, individual data points represent  
947 independent T1 plants. *P*-value from unpaired Student's *t*-test (sample vs. Col) denoted with  
948 asterisks (\* $p < 0.05$ , \*\* $p < 0.005$ , \*\*\* $p < 0.0005$ ). (E-F) Mean days to flower in (E) long-day (LD)  
949 and (F) short-day (SD) conditions for Col, rH4-1, rH4-2, rH4R17A-1, rH4R17A-2, *prmt7-1*,  
950 *prmt7-2*, and *35S::PRMT7* T1 plants. Standard deviation denoted with error bars. Statistical  
951 analyses were performed using one-way ANOVA with Tukey's HSD post hoc test. *P*-value from  
952 Tukey's HSD test (genotype vs. Col) denoted with asterisks (\* $p < 0.05$ , \*\* $p < 0.005$ , \*\*\* $p < 0.0005$ ).  
953  $n \geq 11$  for long-day,  $n \geq 5$  for short-day.

954 **Figure 4: H4R17 and ISWI are functionally related in the regulation of gene expression and**  
955 **plant development.** (A) Morphological phenotypes of Col, rH4-1, rH4-2, rH4R17A-1, rH4R17A-  
956 2, *rlt1/2*, *arid5*, and *chr11/17* plants grown in long-day conditions at 21 days. (B) Rosette leaf  
957 phenotype of Col, rH4-1, rH4-2, rH4R17A-1, rH4R17A-2, *rlt1/2*, *arid5*, and *chr11/17* plants.  
958 Rosette leaves were cut from plants shortly after bolting in long-day conditions. (C-D) Mean (C)  
959 days to flower and (D) rosette leaf number at flowering in long-day (LD) conditions for Col, rH4-  
960 1, rH4-2, rH4R17A-1, rH4R17A-2, *rlt1/2*, *arid5*, and *chr11/17* plants. Standard deviation shown  
961 with error bars. Statistical analyses were performed using one-way ANOVA with Tukey's HSD  
962 post hoc test. *P*-value from Tukey's HSD test (genotype vs. Col) denoted with asterisks (\* $p < 0.05$ ,  
963 \*\* $p < 0.005$ , \*\*\* $p < 0.0005$ ).  $n = 12$ . (E-G) Venn diagrams showing DEGs (relative to Col) identified  
964 by RNA-seq in (E) rH4R17A and *chr11/17*, (F) rH4R17A and *arid5*, and (G) rH4R17A and *rlt1/2*  
965 plants. (H) Heatmap of relative expression patterns of shared DEGs identified in the rH4R17A-1



966 and rH4R17A-2 mutants. Legend represents scaled Z-score on normalized read counts. Clustering  
967 of rows and columns calculated using Euclidean distance. (I) Normalized read counts at *FUL*,  
968 *SOCI*, and *FT* in Col, rH4-1, rH4-2, rH4R17A-1, rH4R17A-2, *arid5*, *rlt1/2*, *chr11/17*, and *piel*  
969 plants.

970 **Figure 5: Determination of the function of H4R17 on regulating nucleosome positioning.** (A-  
971 G) Average nucleosome occupancy relative to the TSS (in bp) of (A) all protein-coding genes, (B)  
972 expressed protein-coding genes, (C) unexpressed protein-coding genes, (D) genes with expression  
973 changes in rH4R17A, *arid5*, *rlt1/2*, and/or *chr11/17* mutants, (E) genes with no expression changes  
974 in rH4R17A, *arid5*, *rlt1/2*, and/or *chr11/17* mutants, (F) upregulated genes and (G) downregulated  
975 genes in rH4R17A, *arid5*, *rlt1/2*, and/or *chr11/17* mutants. The MNase-seq results were generated  
976 from two independent biological replicates and RNA-seq data were obtained from the same tissues  
977 used for MNase-seq. Cutoffs were defined as follows: Expressed  $\geq 0.5$  TPM; Unexpressed  $< 0.5$   
978 TPM. Genes with expression changes were defined as  $> \pm 1.5$ -fold vs. Col and genes with no  
979 expression changes were defined as  $< \pm 1.1$ -fold vs. Col. (H-N) Fold change in  $\Delta$ Nucleosome  
980 Occupancy of +2 through +6 nucleosome peaks relative to Col corresponding to (H) all protein-  
981 coding genes, (I) expressed protein-coding genes, (J) unexpressed protein-coding genes, (K) genes  
982 with expression changes in rH4R17A, *arid5*, *rlt1/2*, and/or *chr11/17* mutants, (L) genes with no  
983 expression changes in rH4R17A, *arid5*, *rlt1/2*, and/or *chr11/17* mutants, (M) upregulated genes  
984 and (N) downregulated genes in rH4R17A, *arid5*, *rlt1/2*, and/or *chr11/17* mutants. Standard  
985 deviation denoted with error bars. *P*-value from paired Student's *t*-test denoted with asterisks  
986 (\* $p < 0.05$ , \*\* $p < 0.005$ , \*\*\* $p < 0.0005$ ).

987 **Figure 6: Model for the role of H4R17 in plants.** Proposed model for the role of histone H4  
988 arginine 17 in the regulation of ISWI complexes in *A. thaliana*. 5' NFR: 5' Nucleosome-Free  
989 Region.

990 **Supplemental Figures**

991 **Supplemental Figure 1: CRISPR/Cas9-induced mutations in the H4 septuple mutant of *A.***  
992 ***thaliana*.** (A) Multiple sequence alignment of histone H4 proteins performed with Clustal Omega.  
993 Protein sequences were obtained from UniProt and correspond to the following accession numbers:  
994 *Arabidopsis thaliana*; P59259, *Triticum aestivum*; P62785, *Oryza sativa*; Q7XUC9, *Drosophila*  
995 *melanogaster*; P84040, *Mus musculus*; P62806, *Homo sapiens*; P62805, and *Saccharomyces*  
996 *cerevisiae*; P02309. Chemical characteristics of amino acids shown with ClustalX color scheme  
997 (Larkin et al., 2007). (B) Design of the three gRNAs targeting seven endogenous histone H4 genes  
998 in *A. thaliana*. The resulting homozygous mutation in each of the targeted genes in the H4 septuple  
999 mutant is shown.

1000 **Supplemental Figure 2: Impact of histone H4 mutations on the floral transition in *A. thaliana*.**

1001 (A) Mean rosette area of Col, the H4 septuple mutant, and various H4 replacement backgrounds  
1002 (two independent transgenic lines each). Standard deviation shown with error bars ( $n \geq 9$ ).  
1003 Statistical analyses were performed using one-way ANOVA with Tukey's HSD post hoc test. *P*-  
1004 value from Tukey's HSD test (genotype vs. Col) denoted with asterisks (\* $p < 0.05$ , \*\* $p < 0.005$ ,  
1005 \*\*\* $p < 0.0005$ ). (B-C) Mean (B) days to flower and (C) rosette leaf number at flowering in long-  
1006 day (LD) conditions for Col, the H4 septuple mutant, and various H4 replacement backgrounds  
1007 (two independent transgenic lines each). Standard deviation shown with error bars ( $n \geq 11$ ). Letters  
1008 (a,b,c) indicate cluster identified by *k*-means clustering. (D) Scree plot depicting the proportion of  
1009 variance explained by each of the principal components.

1010 **Supplemental Figure 3: Phenotypes of early flowering histone H4 mutants.** Phenotype of Col,  
1011 the H4 septuple mutant, and various H4 replacement backgrounds grown in short-day between 5  
1012 and 7.5 weeks. Two independent transgenic lines were assessed per H4 point mutation. White  
1013 marks present on certain rosette leaves due to leaf counting measurements.

1014 **Supplemental Figure 4: No functional relationship between rH4R17A and *PRMT7* mutations.**

1015 (A) Homozygous or biallelic mutation in histone H4 (*At3g53730*) in rH4-1, rH4-2, rH4R17A-1  
1016 and rH4R17A-2 plants. (B-C) Phenotype of Col, rH4-1, rH4-2, rH4R17A-1, rH4R17A-2, *prmt7*-

1017 *1, prmt7-2, and 35S::PRMT7* T1 plants grown in (B) long-day at 3 weeks and (C) short-day at 8  
1018 weeks.

1019 **Supplemental Figure 5: The effect of ISWI and rH4R17A mutations on the floral transition**  
1020 **and development.** (A) Siliques of Col, rH4-1, rH4-2, rH4R17A-1, rH4R17A-2, *rlt1/2*, *arid5*, and  
1021 *chr11/17* plants grown in long-day for 4 weeks. (B) Morphological phenotypes of Col, rH4-1, rH4-  
1022 2, rH4R17A-1, rH4R17A-2, *rlt1/2*, *arid5*, and *chr11/17* plants grown in short-day at 7 weeks. (C-  
1023 D) Mean (C) days to flower and (D) rosette leaf number at flowering in short-day (SD) conditions  
1024 for Col, rH4-1, rH4-2, rH4R17A-1, rH4R17A-2, *rlt1/2*, *arid5*, and *chr11/17* plants. Standard  
1025 deviation shown with error bars. Statistical analyses were performed using one-way ANOVA with  
1026 Tukey's HSD post hoc test. *P*-value from Tukey's HSD test (genotype vs. Col) denoted with  
1027 asterisks (\**p*<0.01, \*\**p*<0.001, \*\*\**p*<0.0001). *n*=12.

1028 **Supplemental Figure 6: Co-regulation of gene expression observed between rH4R17A and**  
1029 **ISWI mutants.** (A) Venn diagrams showing DEGs (relative to Col) identified by RNA-seq in the  
1030 rH4R17A and *piel* mutants. (B) Genome browser view of RNA-seq signals at *FUL*, *SOC1*, and  
1031 *FT* in biological replicates for Col, rH4-1, rH4-2, rH4R17A-1, rH4R17A-2, *arid5*, *rlt1/2*, *chr11/17*,  
1032 and *piel* plants. Diagrams of genes shown at the bottom, with white boxes, black boxes, and black  
1033 lines representing untranslated regions, exons, and introns, respectively.

1034 **Supplemental Figure 7: Bioanalyzer electropherograms of RNA-seq replicates.** Agilent  
1035 Bioanalyzer 2100 electropherograms for RNA-seq replicates of Col, rH4-1, rH4-2, rH4R17A-1,  
1036 rH4R17A-2, *rlt1/2*, *arid5*, *chr11/17*, and *piel*.

1037 **Supplemental Figure 8: Spearman correlation of RNA-seq replicates.** Spearman correlation  
1038 coefficient analysis for RNA-seq replicates of Col, rH4-1, rH4-2, rH4R17A-1, rH4R17A-2, *rlt1/2*,  
1039 *arid5*, *chr11/17*, and *piel*.

1040 **Supplemental Figure 9: Spearman correlation of MNase-seq replicates.** Spearman correlation  
1041 coefficient analysis for MNase-seq replicates of Col, rH4, rH4R17A, *arid5*, and *rlt1/2*.



1042 **Supplemental Figure 10: Conservation of ISWI proteins.** Multiple sequence alignment of ISWI  
1043 proteins performed with Clustal Omega. Protein sequences were obtained from UniProt and  
1044 correspond to the following accession numbers: *Myceliophthora thermophila*: G2QFM3,  
1045 *Saccharomyces cerevisiae*: P38144, *Arabidopsis thaliana* (CHR11): F4JAV9, *Arabidopsis*  
1046 *thaliana* (CHR17): F4JY25, *Drosophila melanogaster*: Q24368, *Homo sapiens* (SNF2H): O60264.  
1047 Darker shading indicates higher similarity between residues. Red stars above a.a. indicate the  
1048 residues implicated in binding H4R17 on the second RecA-like ATPase core domain (core2)  
1049 identified in *Myceliophthora thermophila* (Yan et al., 2016) and *Saccharomyces cerevisiae* (Yan  
1050 et al., 2019). Protein domains are assigned as reported in a previous study (Yan et al., 2016). HSS:  
1051 HAND–SAND–SLIDE, core1: first RecA-like domain, core2: second RecA-like domain.

1052 **Supplemental Figure 11: Homology model of *Arabidopsis thaliana* CHR11.** (A-B) Homology  
1053 model of *Arabidopsis thaliana* CHR11 a.a. 176-706. (C-D) Reference structure of *Myceliophthora*  
1054 *thermophila* ISWI (5JXR) a.a. 173-718. (E-F) Superposition of *Arabidopsis thaliana* CHR11 and  
1055 *Myceliophthora thermophila* ISWI structures with consistency color scheme (green indicates more  
1056 consistent and red indicates less consistent). Black arrow denotes the predicted (*A. thaliana*) or  
1057 validated (*M. thermophila*) binding pocket of histone H4 arginine 17 (Yan et al., 2016). The boxed  
1058 regions are enlarged for further examinations in (B), (D), and (F).

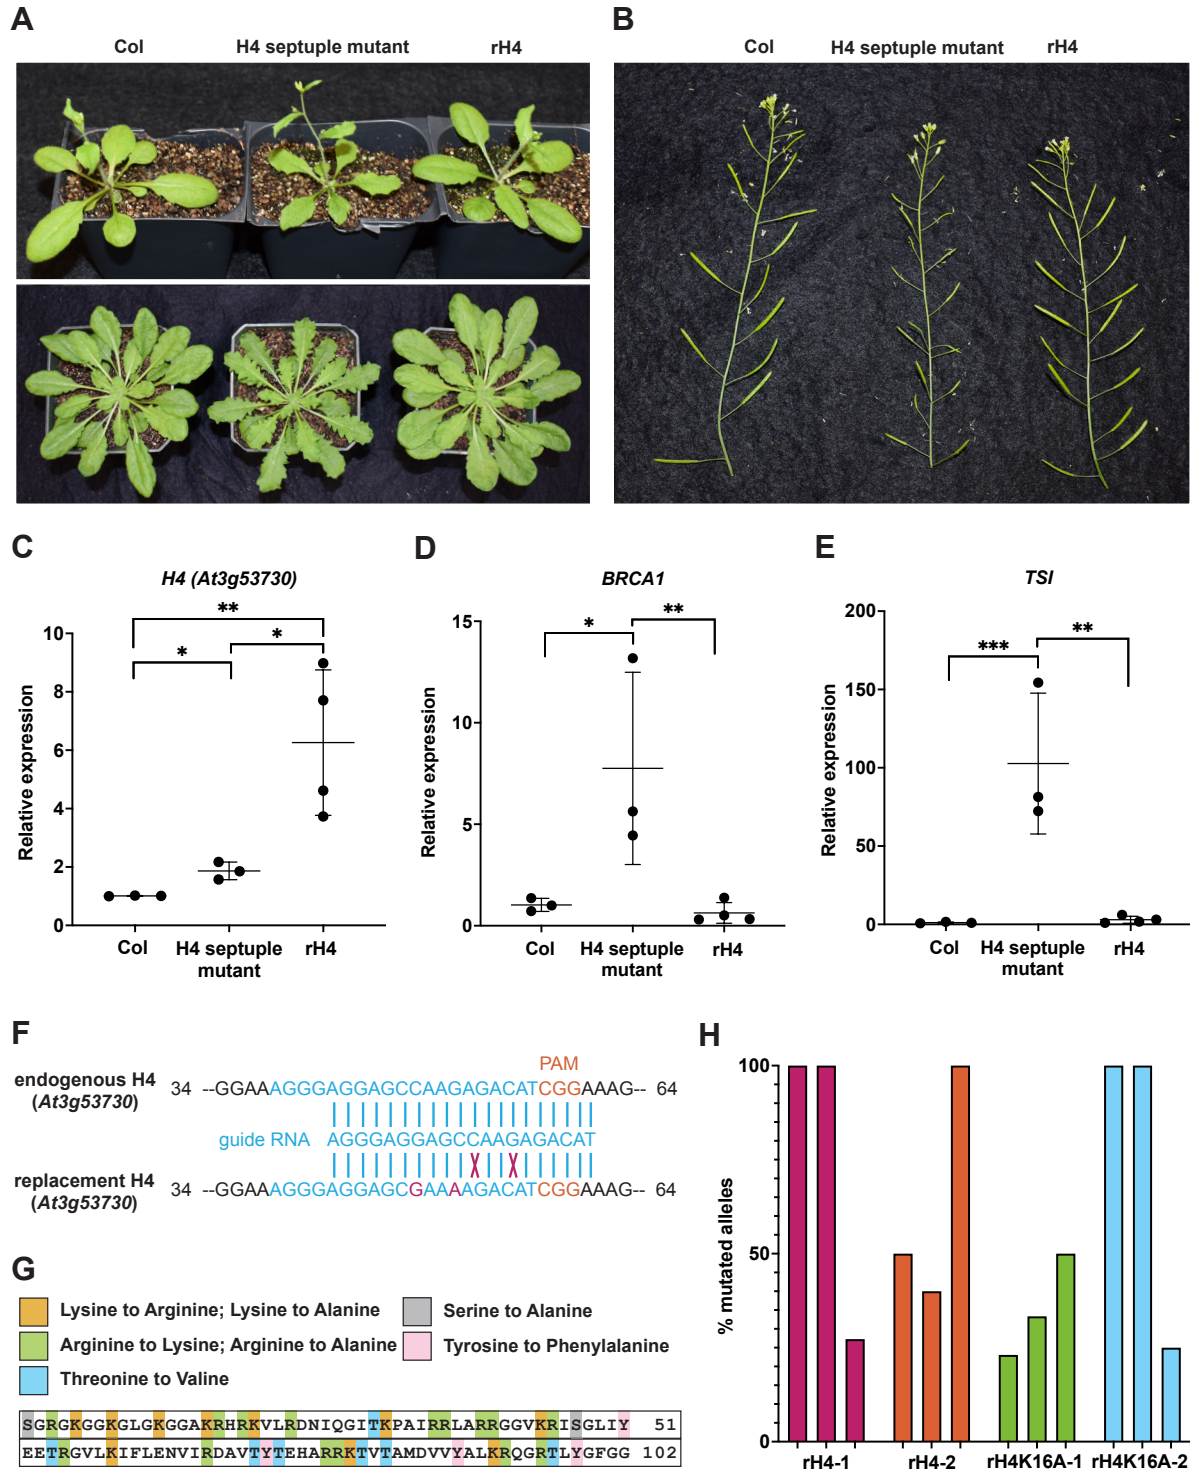

**Figure 1: A CRISPR-based genetic system for expression of H4 point mutants in *A. thaliana*.**

(A) Morphological phenotypes of Col, H4 septuple mutants, and rH4 plants grown in long-day conditions at 3.5 weeks (top) and short-day conditions at 7 weeks (bottom). (B) Siliques of Col, H4 septuple mutants, and rH4 plants grown in long-day conditions for 4 weeks. (C-E) RT-qPCR of (C) *H4 (At3g53730)*, (D) *BRCA1* and (E) *TSI* in Col, H4 septuple mutants, and four independent

rH4 T1 lines. Three biological replicates were included for Col and H4 septuple mutant plants. Horizontal bars indicate the mean. Standard deviation denoted with error bars. *P*-value from unpaired Student's *t*-test denoted with asterisks (\* $p < 0.05$ , \*\* $p < 0.005$ , \*\*\* $p < 0.0005$ ). (F) Design of the gRNA targeting the remaining endogenous H4 gene (*At3g53730*) in the H4 septuple mutant. Mismatches of the replacement H4 gene with the gRNA shown in red. (G) Schematic of point mutations in the H4 replacement plasmid library. (H) Percentage of mutated alleles in six rH4 plants and six rH4K16A plants. Each plant assessed was from the T2 generation; three plants from the same T1 parent were used in this experiment (i.e. two independent T1 lines per genotype).

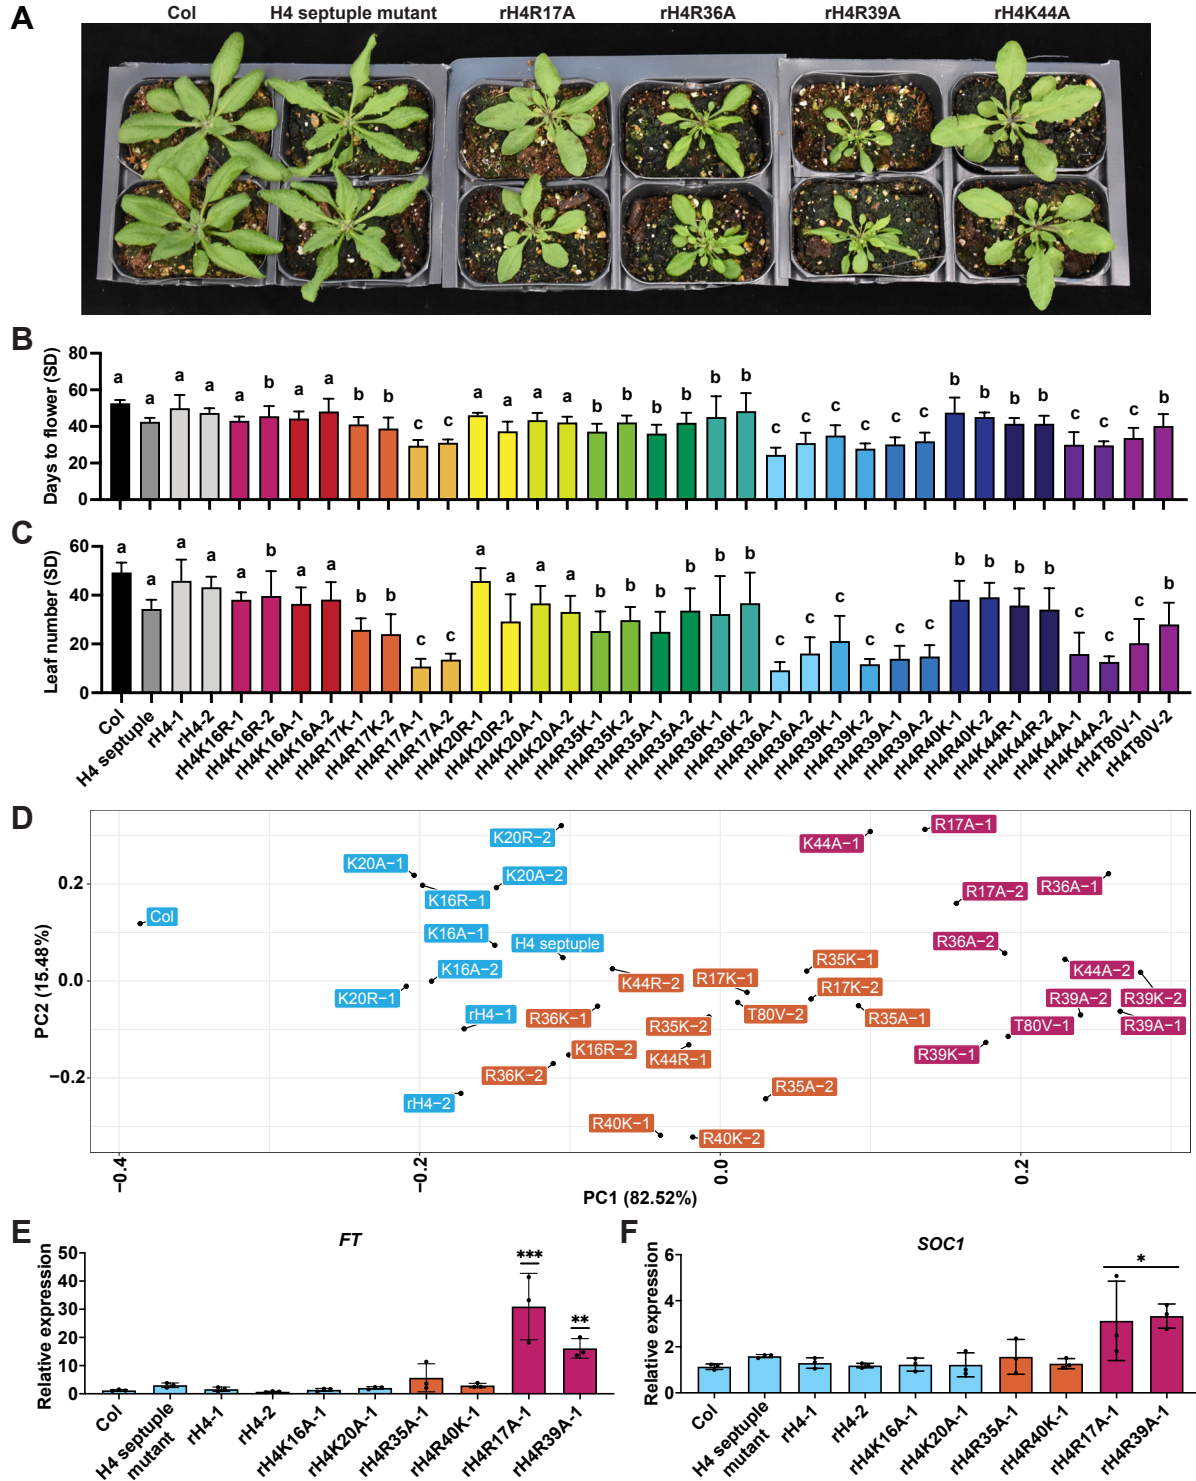

**Figure 2: Mutations in specific residues of histone H4 generate early flowering phenotypes in *A. thaliana*.** (A) Rosette phenotype of Col, H4 septuple mutant, rH4R17A, rH4R36A, rH4R39A, and rH4K44A mutants grown in long-day conditions for 3 weeks. For the rH4 plants, individual T2 plants (top and bottom) from independent T1 parents are shown. (B-C) Mean (B) days to flower and (C) rosette leaf number at flowering in short-day (SD) conditions for Col, the H4 septuple

mutant, and various H4 replacement backgrounds (two independent transgenic lines each). Standard deviation shown with error bars ( $n \geq 7$ ). Letters (a,b,c) indicate cluster identified by  $k$ -means clustering. (D) Principal component plot for flowering time data along the first two principal components, PC1 and PC2. Variance explained by each principal component shown on respective axis. Three clusters produced by  $k$ -means clustering represented in blue (Cluster a), orange (Cluster b), and pink (Cluster c) colors. (E-F) RT-qPCR of (E) *FLC* and (F) *SOC1* in Col, H4 septuple mutant, rH4-1, rH4-2, rH4K16A-1, rH4K20A-1, rH4R35A-1, rH4R40K-1, rH4R17A-1, and rH4R39A-1 plants. Standard deviation denoted with error bars. Statistical analyses were performed using one-way ANOVA with Tukey's HSD post hoc test.  $P$ -value from Tukey's HSD test (genotype vs. Col) denoted with asterisks (\* $p < 0.05$ , \*\* $p < 0.005$ , \*\*\* $p < 0.0005$ ). Bar colors represent cluster assignment from (D).

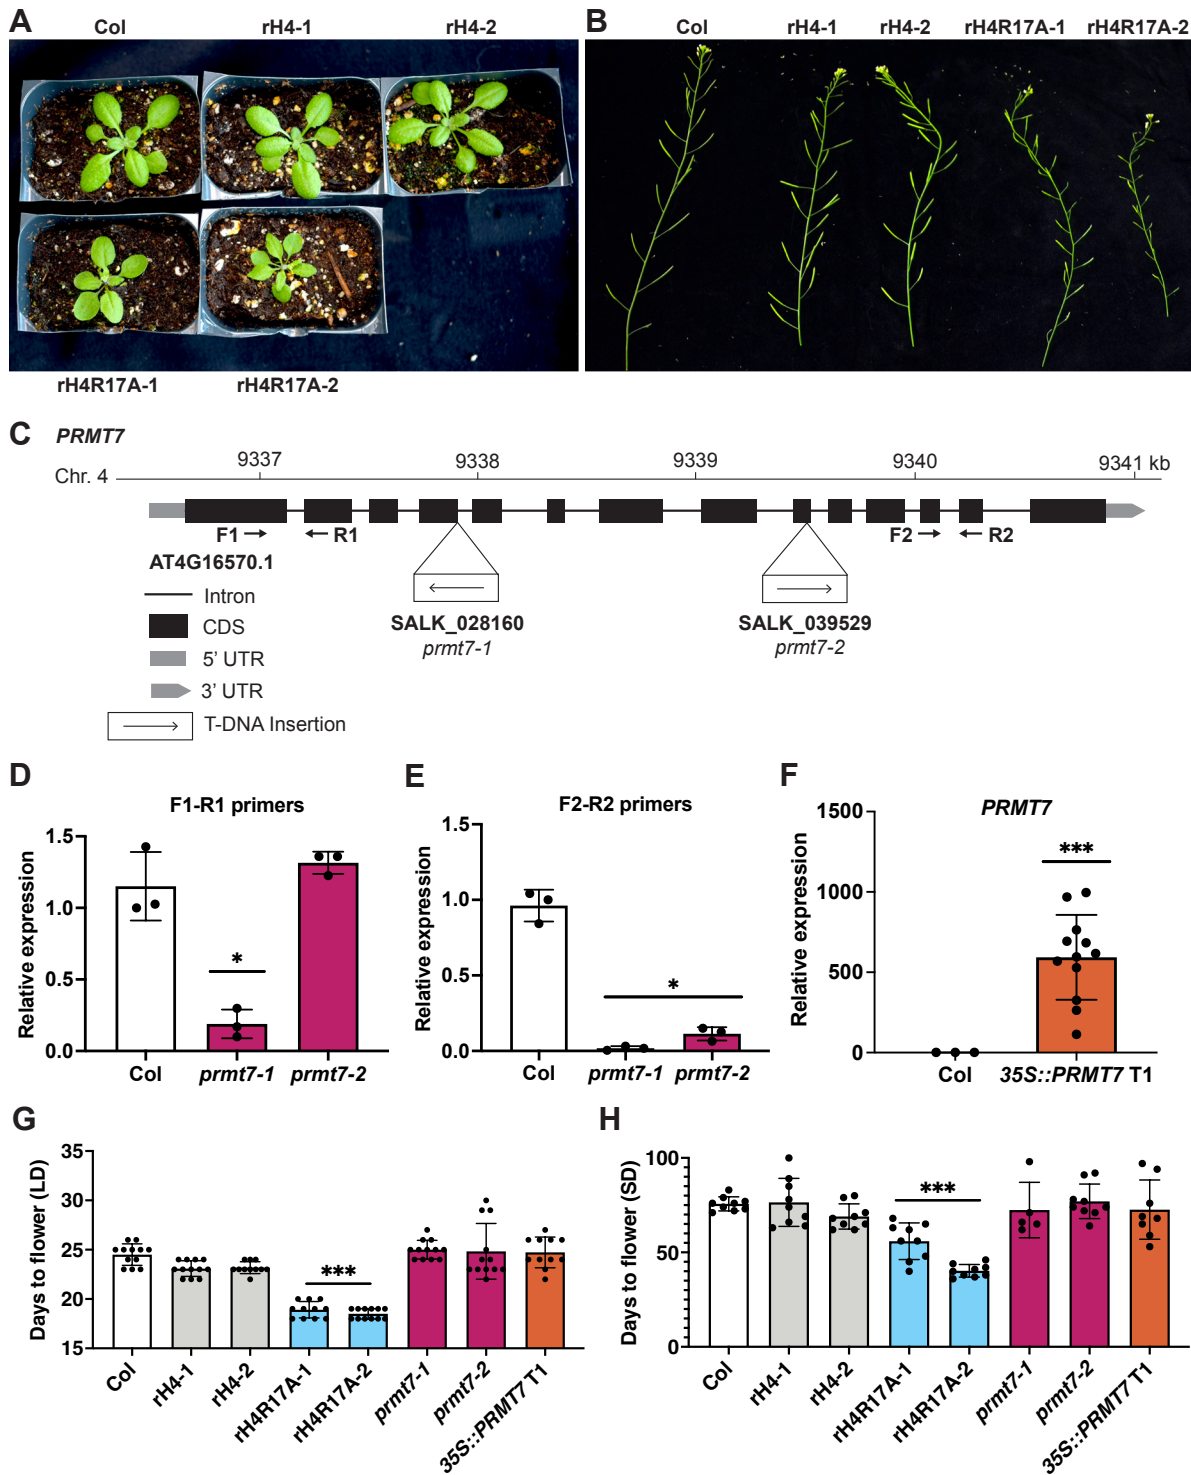

**Figure 3: *PRMT7* does not regulate the floral transition in *A. thaliana*.** (A) Rosette phenotype of Col, rH4-1, rH4-2, rH4R17A-1 and rH4R17A-2 plants grown in long-day conditions at 3 weeks. (B) Silique phenotype of Col, rH4-1, rH4-2, rH4R17A-1 and rH4R17A-2 plants grown in long-day conditions at 4 weeks. (C) Gene structure of *PRMT7*. The location of the T-DNA insertions and the primers (F1-R1 and F2-R2) used for gene expression analyses are shown. (D-F) RT-qPCR



showing *PRMT7* expression in (D-E) Col, *prmt7-1*, and *prmt7-2* plants and (F) Col and *35S::PRMT7* T1 plants. The average of three biological replicates and standard deviation are shown for Col and *prmt7* mutants. For the *35S::PRMT7* plants, individual data points represent independent T1 plants. *P*-value from unpaired Student's *t*-test (sample vs. Col) denoted with asterisks (\**p*<0.05, \*\**p*<0.005, \*\*\**p*<0.0005). (E-F) Mean days to flower in (E) long-day (LD) and (F) short-day (SD) conditions for Col, rH4-1, rH4-2, rH4R17A-1, rH4R17A-2, *prmt7-1*, *prmt7-2*, and *35S::PRMT7* T1 plants. Standard deviation denoted with error bars. Statistical analyses were performed using one-way ANOVA with Tukey's HSD post hoc test. *P*-value from Tukey's HSD test (genotype vs. Col) denoted with asterisks (\**p*<0.05, \*\**p*<0.005, \*\*\**p*<0.0005). *n*≥11 for long-day, *n*≥5 for short-day.

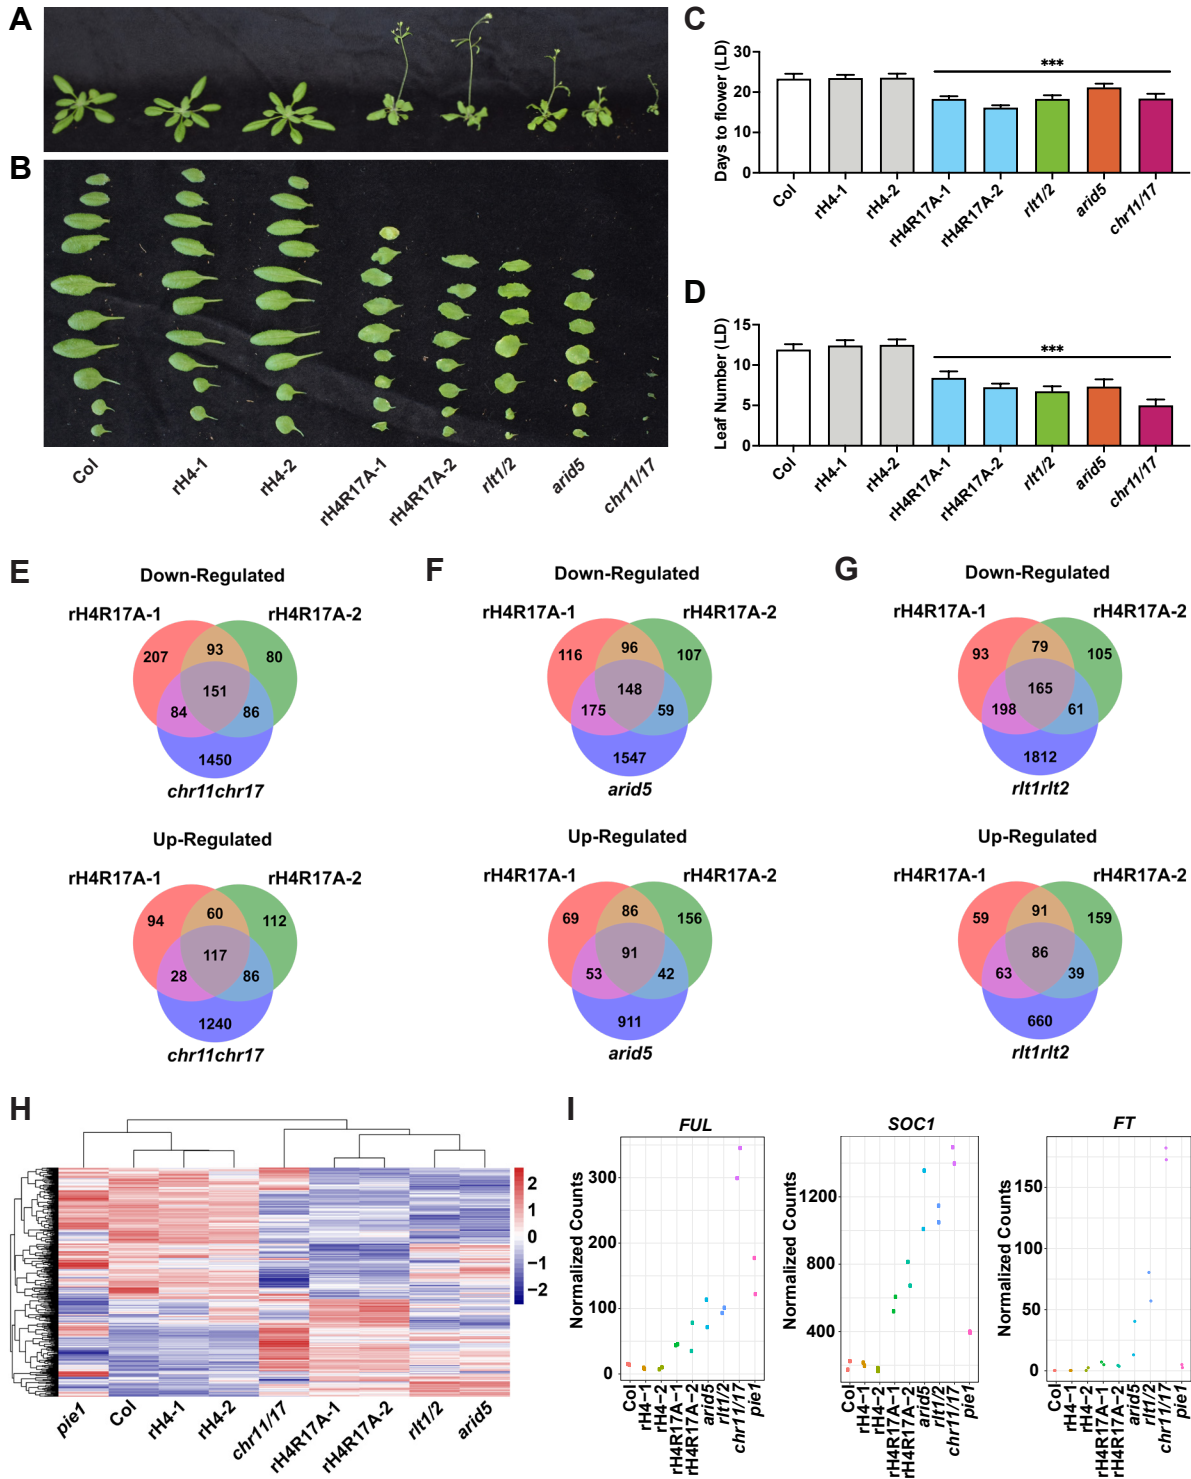

**Figure 4: H4R17 and ISWI are functionally related in the regulation of gene expression and plant development.** (A) Morphological phenotypes of Col, rH4-1, rH4-2, rH4R17A-1, rH4R17A-2, *rlt1/2*, *arid5*, and *chr11/17* plants grown in long-day conditions at 21 days. (B) Rosette leaf phenotype of Col, rH4-1, rH4-2, rH4R17A-1, rH4R17A-2, *rlt1/2*, *arid5*, and *chr11/17* plants. Rosette leaves were cut from plants shortly after bolting in long-day conditions. (C-D) Mean (C)

days to flower and (D) rosette leaf number at flowering in long-day (LD) conditions for Col, rH4-1, rH4-2, rH4R17A-1, rH4R17A-2, *rlt1/2*, *arid5*, and *chr11/17* plants. Standard deviation shown with error bars. Statistical analyses were performed using one-way ANOVA with Tukey's HSD post hoc test. *P*-value from Tukey's HSD test (genotype vs. Col) denoted with asterisks (\* $p < 0.05$ , \*\* $p < 0.005$ , \*\*\* $p < 0.0005$ ).  $n = 12$ . (E-G) Venn diagrams showing DEGs (relative to Col) identified by RNA-seq in (E) rH4R17A and *chr11/17*, (F) rH4R17A and *arid5*, and (G) rH4R17A and *rlt1/2* plants. (H) Heatmap of relative expression patterns of shared DEGs identified in the rH4R17A-1 and rH4R17A-2 mutants. Legend represents scaled Z-score on normalized read counts. Clustering of rows and columns calculated using Euclidean distance. (I) Normalized read counts at *FUL*, *SOC1*, and *FT* in Col, rH4-1, rH4-2, rH4R17A-1, rH4R17A-2, *arid5*, *rlt1/2*, *chr11/17*, and *piel* plants.

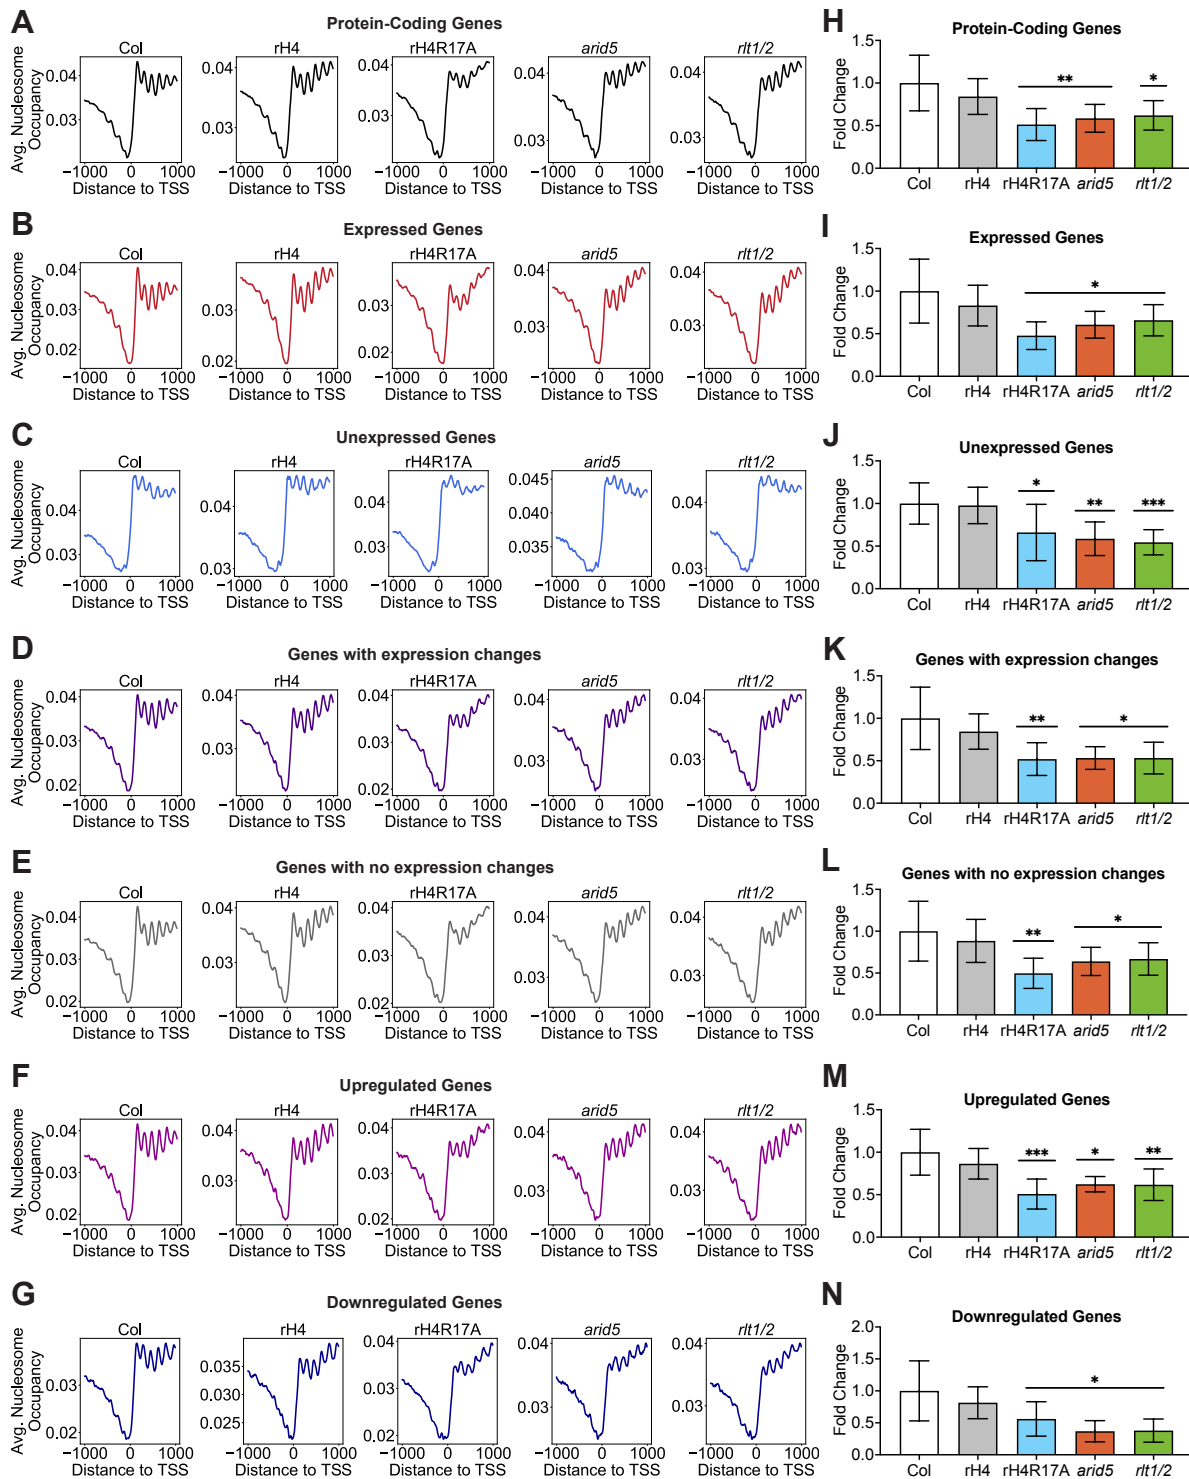

**Figure 5: Determination of the function of H4R17 on regulating nucleosome positioning.** (A-G) Average nucleosome occupancy relative to the TSS (in bp) of (A) all protein-coding genes, (B) expressed protein-coding genes, (C) unexpressed protein-coding genes, (D) genes with expression changes in rH4R17A, *arid5*, *rtl1/2*, and/or *chr11/17* mutants, (E) genes with no expression changes in rH4R17A, *arid5*, *rtl1/2*, and/or *chr11/17* mutants, (F) upregulated genes and (G) downregulated

genes in rH4R17A, *arid5*, *rlt1/2*, and/or *chr11/17* mutants. The MNase-seq results were generated from two independent biological replicates and RNA-seq data were obtained from the same tissues used for MNase-seq. Cutoffs were defined as follows: Expressed  $\geq 0.5$  TPM; Unexpressed  $< 0.5$  TPM. Genes with expression changes were defined as  $> \pm 1.5$ -fold vs. Col and genes with no expression changes were defined as  $< \pm 1.1$ -fold vs. Col. (H-N) Fold change in  $\Delta$ Nucleosome Occupancy of +2 through +6 nucleosome peaks relative to Col corresponding to (H) all protein-coding genes, (I) expressed protein-coding genes, (J) unexpressed protein-coding genes, (K) genes with expression changes in rH4R17A, *arid5*, *rlt1/2*, and/or *chr11/17* mutants, (L) genes with no expression changes in rH4R17A, *arid5*, *rlt1/2*, and/or *chr11/17* mutants, (M) upregulated genes and (N) downregulated genes in rH4R17A, *arid5*, *rlt1/2*, and/or *chr11/17* mutants. Standard deviation denoted with error bars. *P*-value from paired Student's *t*-test denoted with asterisks (\* $p < 0.05$ , \*\* $p < 0.005$ , \*\*\* $p < 0.0005$ ).

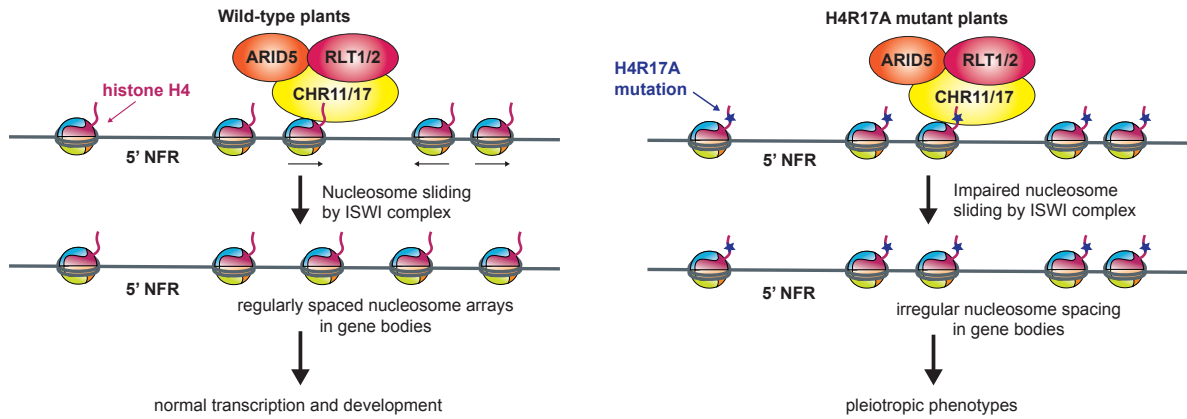

**Figure 6: Model for the role of H4R17 in plants.** Proposed model for the role of histone H4 arginine 17 in the regulation of ISWI complexes in *A. thaliana*. 5' NFR: 5' Nucleosome-Free Region.



## Supplemental Figures

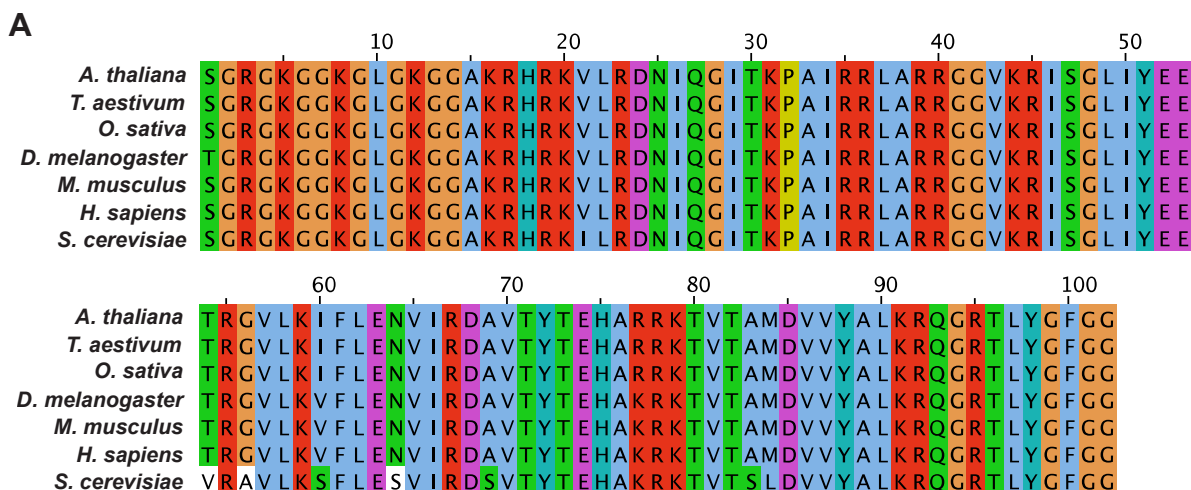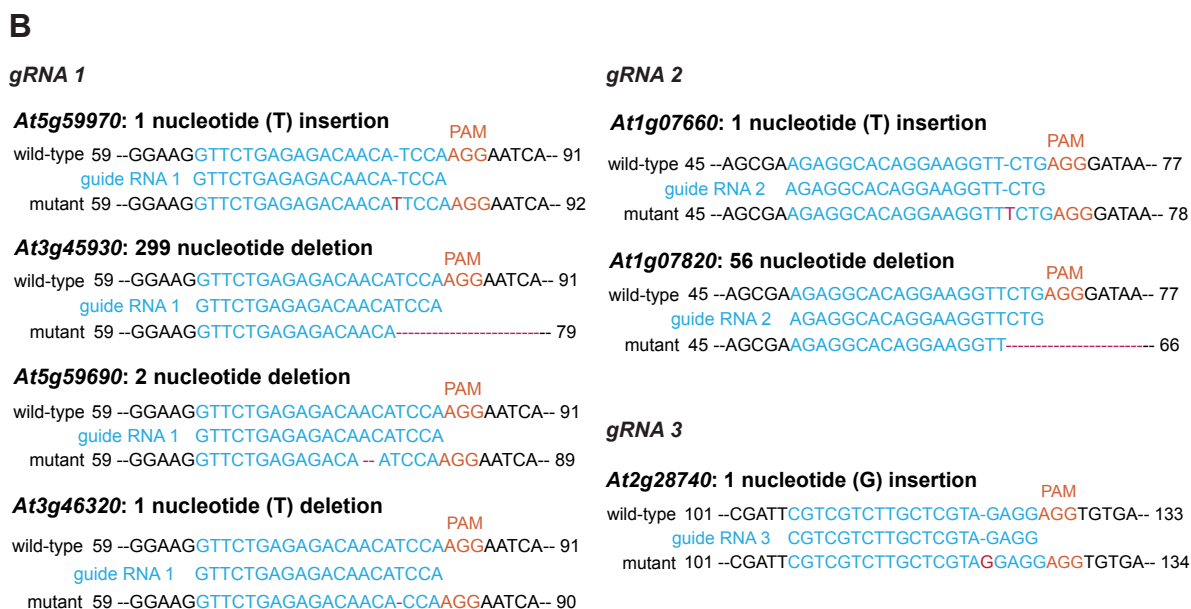

**Supplemental Figure 1: CRISPR/Cas9-induced mutations in the H4 septuple mutant of *A. thaliana*.** (A) Multiple sequence alignment of histone H4 proteins performed with Clustal Omega. Protein sequences were obtained from UniProt and correspond to the following accession numbers: *Arabidopsis thaliana*; P59259, *Triticum aestivum*; P62785, *Oryza sativa*; Q7XUC9, *Drosophila melanogaster*; P84040, *Mus musculus*; P62806, *Homo sapiens*; P62805, and *Saccharomyces cerevisiae*; P02309. Chemical characteristics of amino acids shown with ClustalX color scheme (Larkin et al., 2007). (B) Design of the three gRNAs targeting seven endogenous histone H4 genes in *A. thaliana*. The resulting homozygous mutation in each of the targeted genes in the H4 septuple mutant is shown.

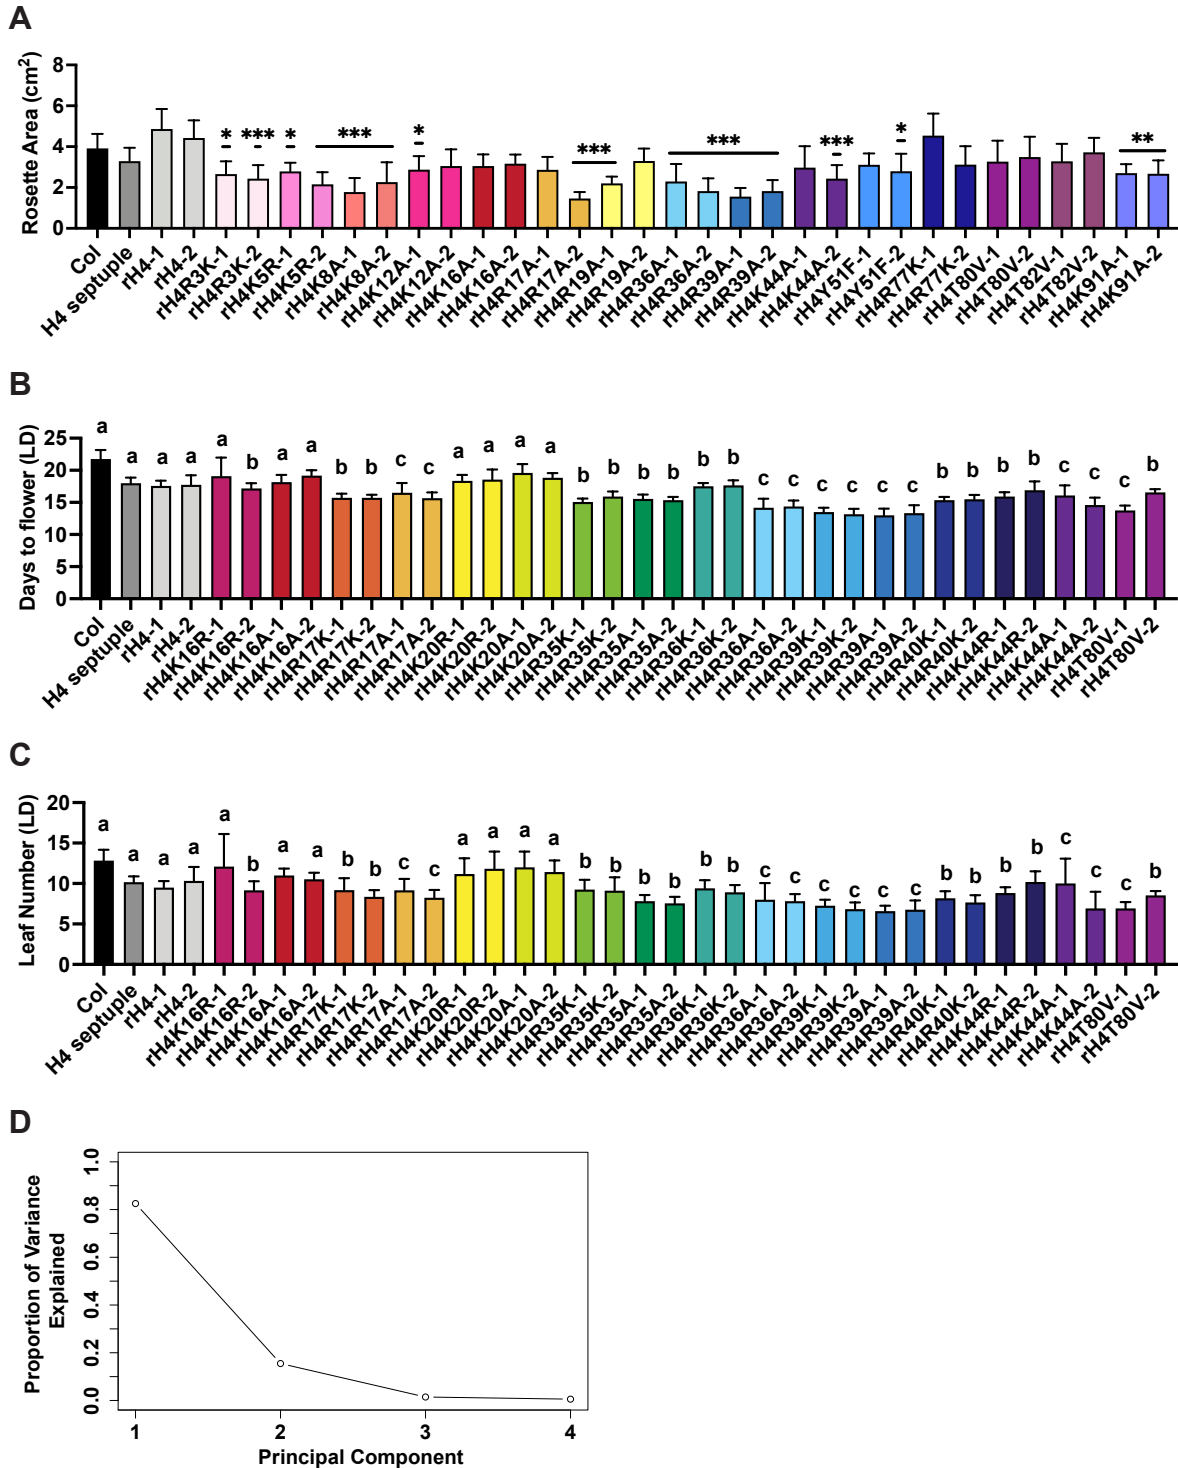

**Supplemental Figure 2: Impact of histone H4 mutations on the floral transition in *A. thaliana*.**

(A) Mean rosette area of Col, the H4 septuple mutant, and various H4 replacement backgrounds (two independent transgenic lines each). Standard deviation shown with error bars ( $n \geq 9$ ). Statistical analyses were performed using one-way ANOVA with Tukey's HSD post hoc test.  $P$ -value from Tukey's HSD test (genotype vs. Col) denoted with asterisks (\* $p < 0.05$ , \*\* $p < 0.005$ ,

\*\*\* $p < 0.0005$ ). (B-C) Mean (B) days to flower and (C) rosette leaf number at flowering in long-day (LD) conditions for Col, the H4 septuple mutant, and various H4 replacement backgrounds (two independent transgenic lines each). Standard deviation shown with error bars ( $n \geq 11$ ). Letters (a,b,c) indicate cluster identified by  $k$ -means clustering. (D) Scree plot depicting the proportion of variance explained by each of the principal components.

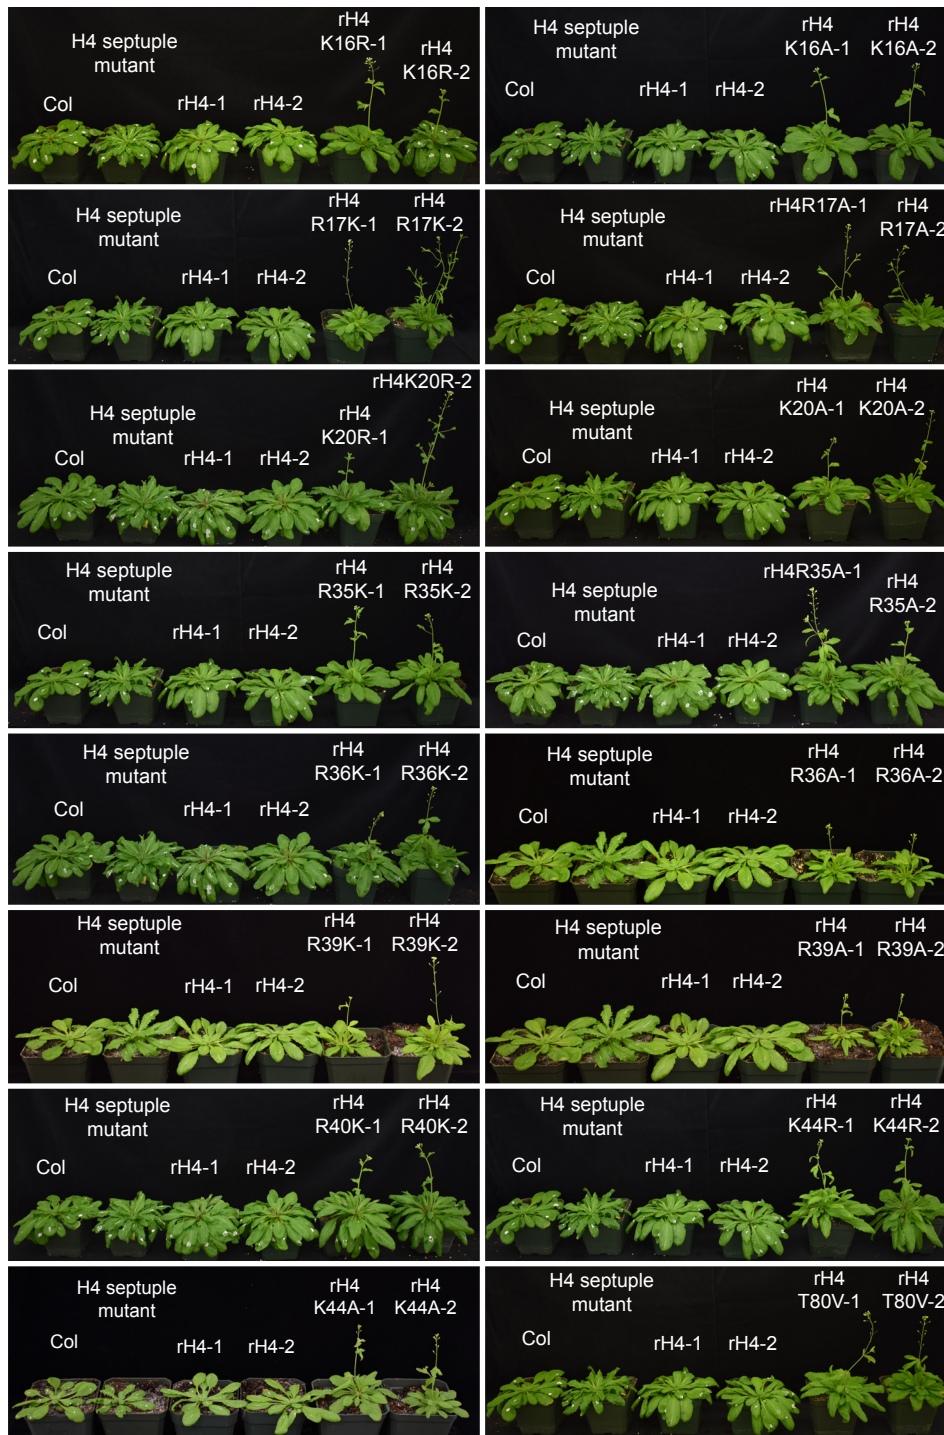

**Supplemental Figure 3: Phenotypes of early flowering histone H4 mutants.** Phenotype of Col, the H4 septuple mutant, and various H4 replacement backgrounds grown in short-day between 5 and 7.5 weeks. Two independent transgenic lines were assessed per H4 point mutation. White marks present on certain rosette leaves due to leaf counting measurements.







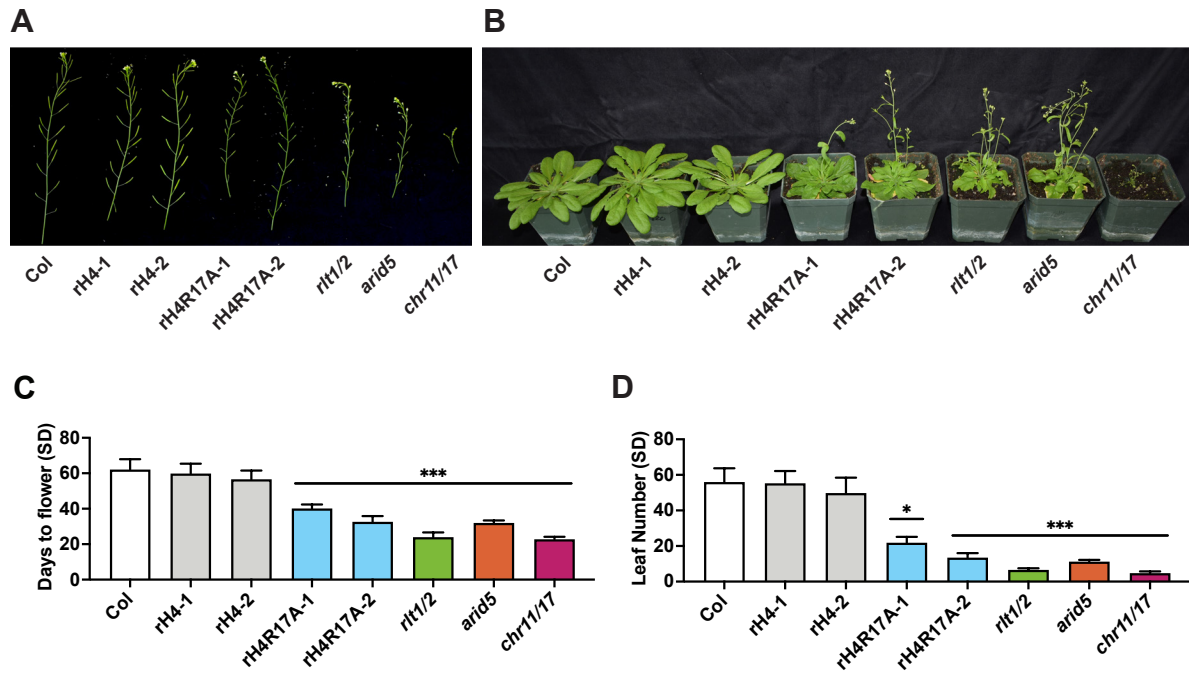

**Supplemental Figure 5: The effect of ISWI and rH4R17A mutations on the floral transition and development.** (A) Siliques of Col, rH4-1, rH4-2, rH4R17A-1, rH4R17A-2, *rlt1/2*, *arid5*, and *chr11/17* plants grown in long-day for 4 weeks. (B) Morphological phenotypes of Col, rH4-1, rH4-2, rH4R17A-1, rH4R17A-2, *rlt1/2*, *arid5*, and *chr11/17* plants grown in short-day at 7 weeks. (C-D) Mean (C) days to flower and (D) rosette leaf number at flowering in short-day (SD) conditions for Col, rH4-1, rH4-2, rH4R17A-1, rH4R17A-2, *rlt1/2*, *arid5*, and *chr11/17* plants. Standard deviation shown with error bars. Statistical analyses were performed using one-way ANOVA with Tukey's HSD post hoc test. *P*-value from Tukey's HSD test (genotype vs. Col) denoted with asterisks (\**p*<0.01, \*\**p*<0.001, \*\*\**p*<0.0001). *n*=12.

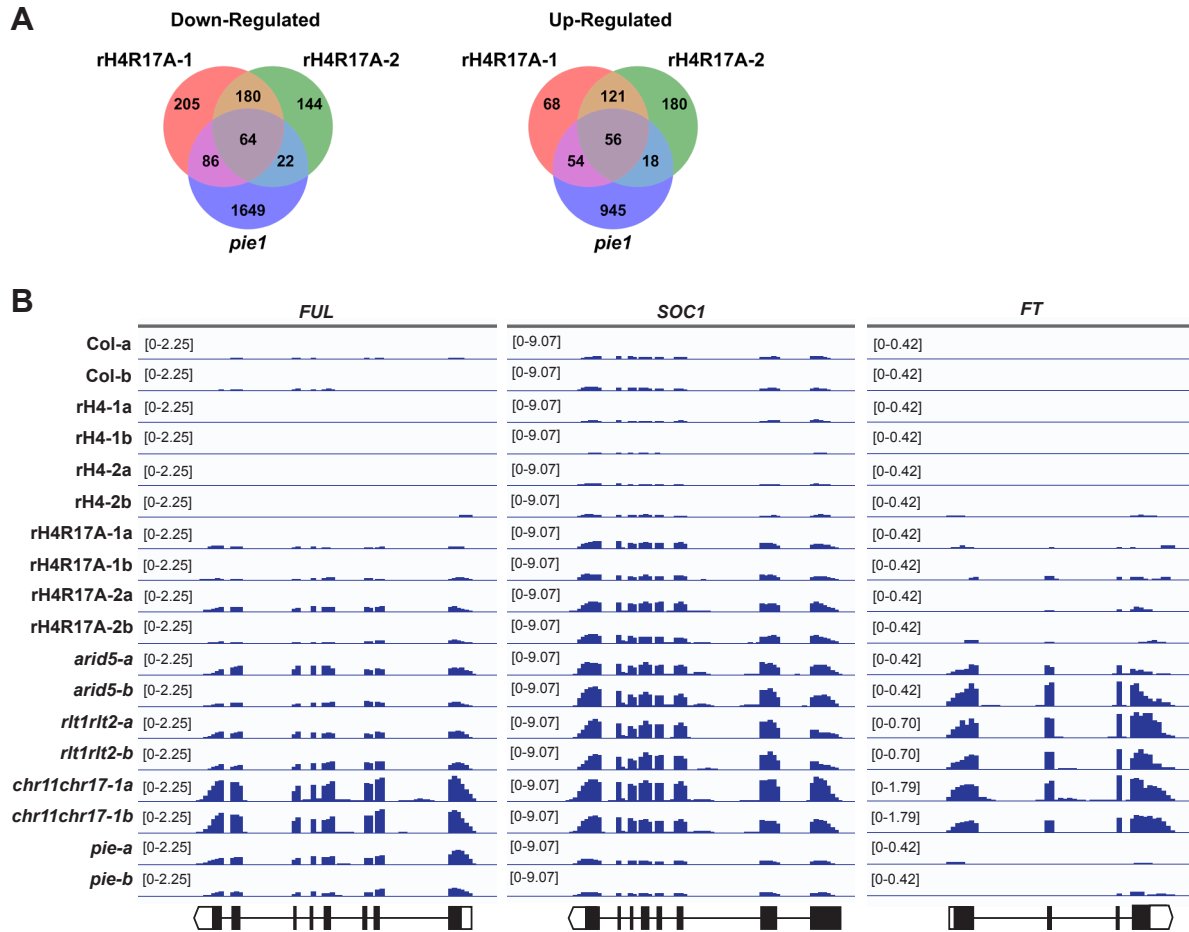

**Supplemental Figure 6: Co-regulation of gene expression observed between rH4R17A and ISWI mutants.** (A) Venn diagrams showing DEGs (relative to Col) identified by RNA-seq in the rH4R17A and *pie1* mutants. (B) Genome browser view of RNA-seq signals at *FUL*, *SOC1*, and *FT* in biological replicates for Col, rH4-1, rH4-2, rH4R17A-1, rH4R17A-2, *arid5*, *rtl1/2*, *chr11/17*, and *pie1* plants. Diagrams of genes shown at the bottom, with white boxes, black boxes, and black lines representing untranslated regions, exons, and introns, respectively.

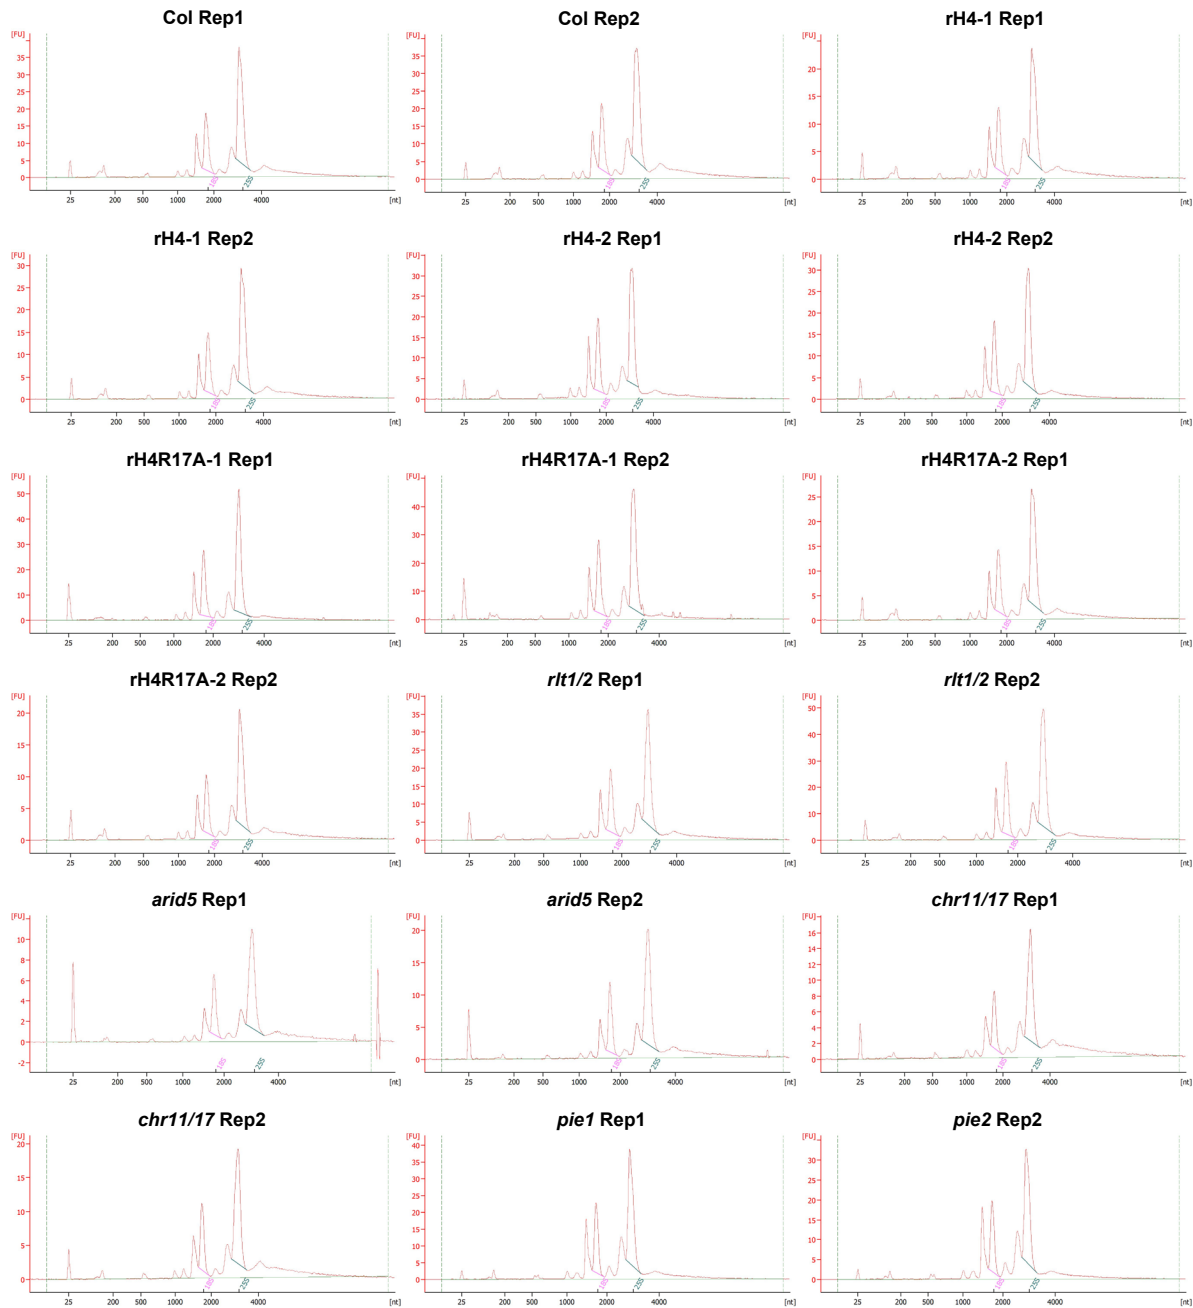

**Supplemental Figure 7: Bioanalyzer electropherograms of RNA-seq replicates.** Agilent Bioanalyzer 2100 electropherograms for RNA-seq replicates of Col, rH4-1, rH4-2, rH4R17A-1, rH4R17A-2, *rlt1/2*, *arid5*, *chr11/17*, and *pie1*.

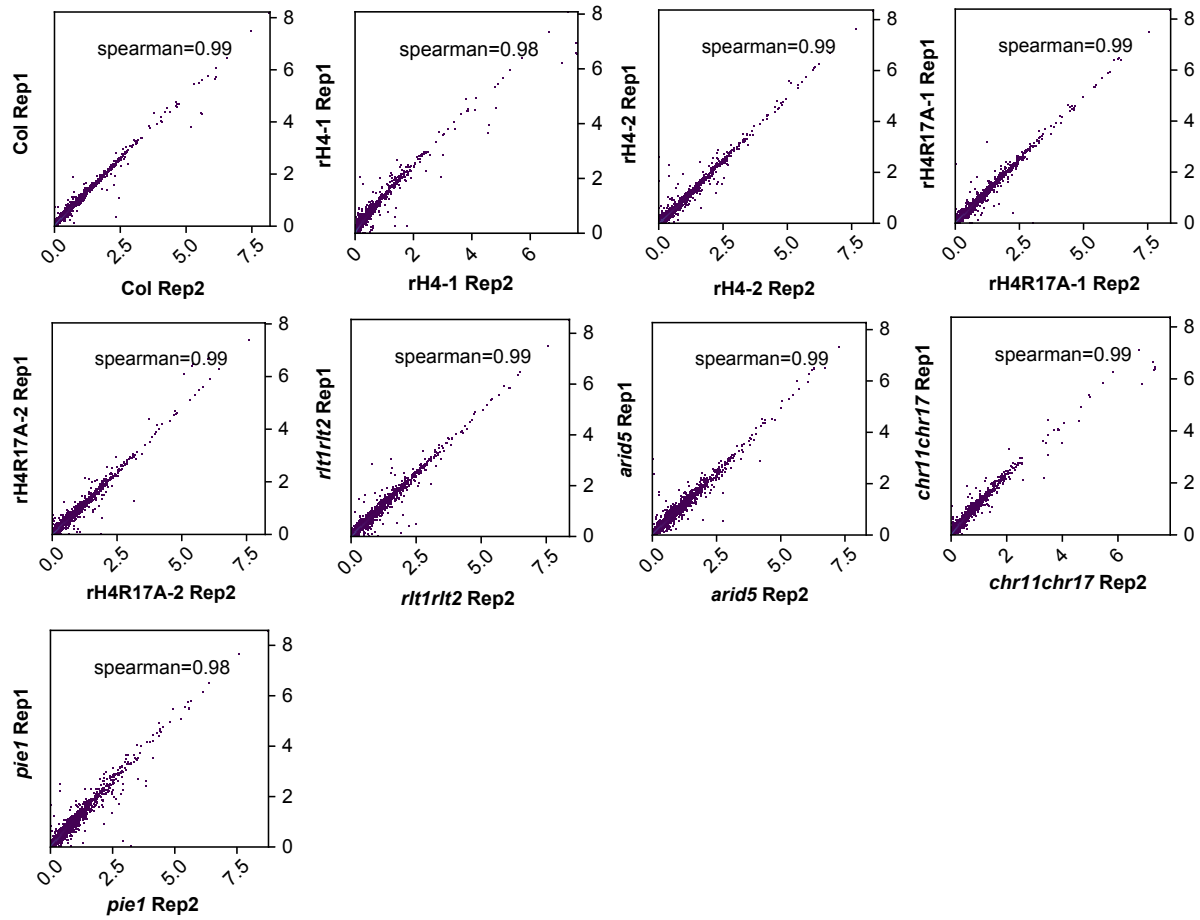

**Supplemental Figure 8: Spearman correlation of RNA-seq replicates.** Spearman correlation coefficient analysis for RNA-seq replicates of Col, rH4-1, rH4-2, rH4R17A-1, rH4R17A-2, *rlt1/2*, *arid5*, *chr11/17*, and *pie1*.

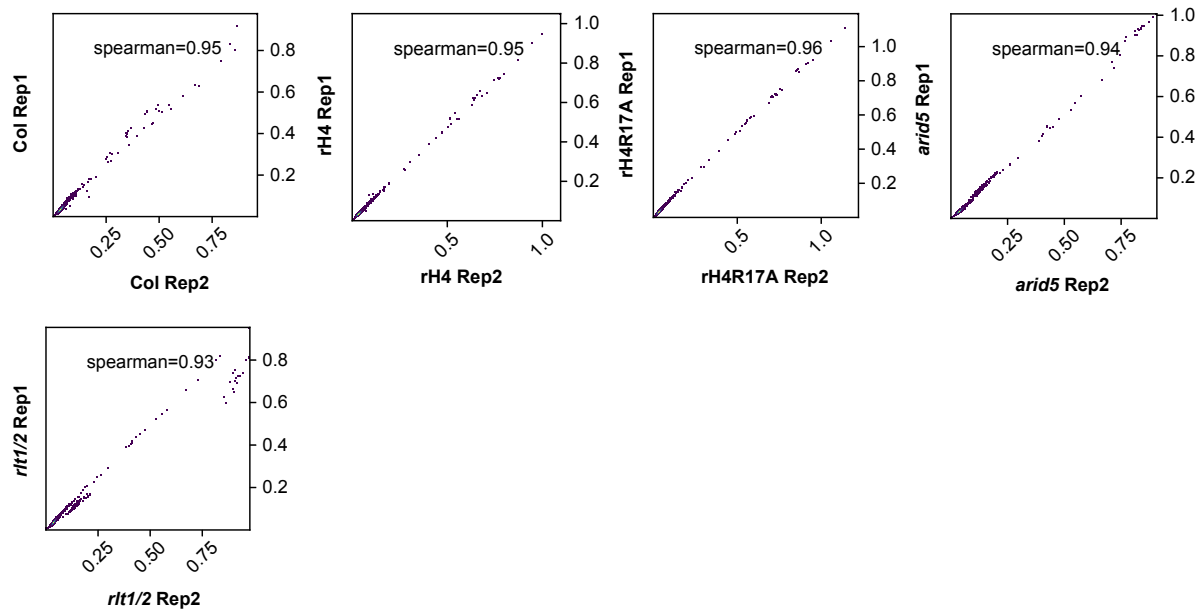

**Supplemental Figure 9: Spearman correlation of MNase-seq replicates.** Spearman correlation coefficient analysis for MNase-seq replicates of Col, rH4, rH4R17A, *arid5*, and *rlt1/2*.





Darker shading indicates higher similarity between residues. Red stars above a.a. indicate the residues implicated in binding H4R17 on the second RecA-like ATPase core domain (core2) identified in *Myceliophthora thermophila* (Yan et al., 2016) and *Saccharomyces cerevisiae* (Yan et al., 2019). Protein domains are assigned as reported in a previous study (Yan et al., 2016). HSS: HAND–SAND–SLIDE, core1: first RecA-like domain, core2: second RecA-like domain.

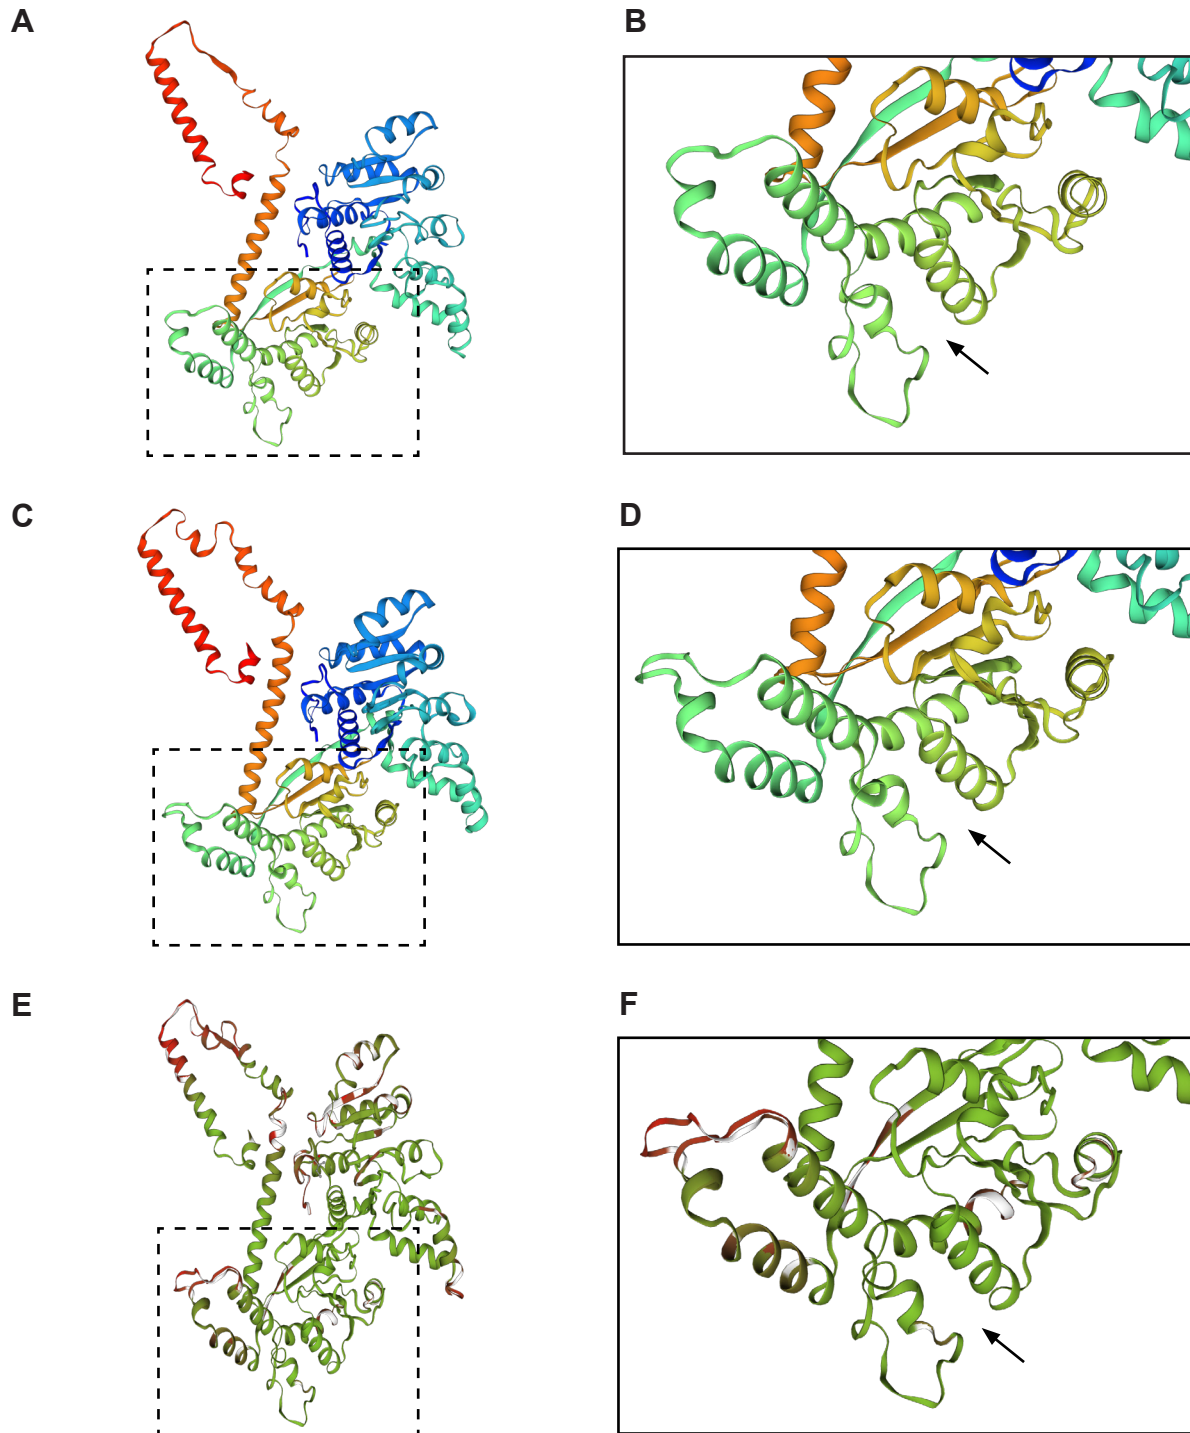

**Supplemental Figure 11: Homology model of *Arabidopsis thaliana* CHR11.** (A-B) Homology model of *Arabidopsis thaliana* CHR11 a.a. 176-706. (C-D) Reference structure of *Myceliophthora thermophila* ISWI (5JXR) a.a. 173-718. (E-F) Superposition of *Arabidopsis thaliana* CHR11 and *Myceliophthora thermophila* ISWI structures with consistency color scheme (green indicates more consistent and red indicates less consistent). Black arrow denotes the predicted (*A. thaliana*) or

validated (*M. thermophila*) binding pocket of histone H4 arginine 17 (Yan et al., 2016). The boxed regions are enlarged for further examinations in (B), (D), and (F).
